# Supplementary material for: Revisiting the bromination of 3β-hydroxycholest-5-ene with CBr 4 /PPh 3 and the subsequent azidolysis of the resulting bromide, disparity in stereochemical behavior
Source: publisher site journal article supplement (doi:10.3762/bjoc.19.9), 2023-01-27

## checkCIF/PLATON report

You have not supplied any structure factors. As a result the full set of tests cannot be run.

THIS REPORT IS FOR GUIDANCE ONLY. IF USED AS PART OF A REVIEW PROCEDURE FOR PUBLICATION, IT SHOULD NOT REPLACE THE EXPERTISE OF AN EXPERIENCED CRYSTALLOGRAPHIC REFEREE.

No syntax errors found.      CIF dictionary      Interpreting this report

### Datablock: 3

---

Bond precision:    C-C = 0.0168 A                      Wavelength=0.71073

Cell:                      a=11.4127(12)              b=7.5896(9)              c=28.603(5)  
                            alpha=90                  beta=90.077(13)          gamma=90

Temperature:            120 K

|                        | Calculated   | Reported     |
|------------------------|--------------|--------------|
| Volume                 | 2477.5(6)    | 2477.5(6)    |
| Space group            | P 21         | P 1 21 1     |
| Hall group             | P 2yb        | P 2yb        |
| Moiety formula         | C27 H45 Br   | C27 H45 Br   |
| Sum formula            | C27 H45 Br   | C27 H45 Br   |
| Mr                     | 449.53       | 449.54       |
| Dx, g cm <sup>-3</sup> | 1.205        | 1.205        |
| Z                      | 4            | 4            |
| Mu (mm <sup>-1</sup> ) | 1.669        | 1.669        |
| F000                   | 968.0        | 968.0        |
| F000'                  | 967.13       |              |
| h, k, lmax             | 15, 10, 39   | 15, 10, 37   |
| Nref                   | 13372[ 7169] | 11562        |
| Tmin, Tmax             | 0.721, 0.911 | 0.544, 1.000 |
| Tmin'                  | 0.651        |              |

Correction method= # Reported T Limits: Tmin=0.544 Tmax=1.000  
AbsCorr = GAUSSIAN

Data completeness= 1.61/0.86                      Theta(max)= 29.160

R(reflections)= 0.0982( 5812)

wR2(reflections)=  
0.3085( 11562)

S = 1.055

Npar= 467

---

The following ALERTS were generated. Each ALERT has the format  
**test-name\_ALERT\_alert-type\_alert-level.**

Click on the hyperlinks for more details of the test.

---

 **Alert level B**

PLAT110\_ALERT\_2\_B ADDSYM Detects Potential Lattice Translation ... ? Check

**Author Response: The unit cell is extremely close to higher (orthorhombic) symmetry. which was thoroughly explored. However, close examination of the metrics confirm that the assignment as monoclinic to be correct.**

PLAT341\_ALERT\_3\_B Low Bond Precision on C-C Bonds ..... 0.01683 Ang.

**Author Response: The crystals supplied were all heavily twinned, with data being collected on the best of those tested. The twinning could not be accounted for by a suitable twin law, and was therefore left untreated in the final model, which had a detrimental effect on the bond precision of the light atoms. However, the identity of the structure was clearly established without issue.**

---

 **Alert level C**

PLAT084\_ALERT\_3\_C High wR2 Value (i.e. > 0.25) ..... 0.31 Report  
PLAT213\_ALERT\_2\_C Atom C54 has ADP max/min Ratio ..... 3.1 prolat  
PLAT213\_ALERT\_2\_C Atom C55 has ADP max/min Ratio ..... 3.1 prolat  
PLAT230\_ALERT\_2\_C Hirshfeld Test Diff for C75 --C77 . 5.4 s.u.  
PLAT242\_ALERT\_2\_C Low 'MainMol' Ueq as Compared to Neighbors of C75 Check

---

 **Alert level G**

PLAT003\_ALERT\_2\_G Number of Uiso or Uij Restrained non-H Atoms ... 18 Report  
PLAT072\_ALERT\_2\_G SHELXL First Parameter in WGHT Unusually Large 0.12 Report  
PLAT112\_ALERT\_2\_G ADDSYM Detects New (Pseudo) Symm. Elem B 100 %Fit  
PLAT113\_ALERT\_2\_G ADDSYM Suggests Possible Pseudo/New Space Group P21 Check  
Note: (Pseudo) Lattice Translation Implemented  
PLAT171\_ALERT\_4\_G The CIF-Embedded .res File Contains EADP Records 5 Report  
PLAT187\_ALERT\_4\_G The CIF-Embedded .res File Contains RIGU Records 2 Report  
PLAT791\_ALERT\_4\_G Model has Chirality at C3 (Sohnke SpGr) S Verify  
PLAT791\_ALERT\_4\_G Model has Chirality at C8 (Sohnke SpGr) S Verify  
PLAT791\_ALERT\_4\_G Model has Chirality at C9 (Sohnke SpGr) S Verify  
PLAT791\_ALERT\_4\_G Model has Chirality at C10 (Sohnke SpGr) R Verify  
PLAT791\_ALERT\_4\_G Model has Chirality at C13 (Sohnke SpGr) S Verify  
PLAT791\_ALERT\_4\_G Model has Chirality at C14 (Sohnke SpGr) S Verify  
PLAT791\_ALERT\_4\_G Model has Chirality at C17 (Sohnke SpGr) R Verify  
PLAT791\_ALERT\_4\_G Model has Chirality at C20 (Sohnke SpGr) R Verify  
PLAT791\_ALERT\_4\_G Model has Chirality at C53 (Sohnke SpGr) S Verify  
PLAT791\_ALERT\_4\_G Model has Chirality at C58 (Sohnke SpGr) S Verify  
PLAT791\_ALERT\_4\_G Model has Chirality at C59 (Sohnke SpGr) S Verify  
PLAT791\_ALERT\_4\_G Model has Chirality at C60 (Sohnke SpGr) R Verify

|                   |                                                  |               |          |
|-------------------|--------------------------------------------------|---------------|----------|
| PLAT791_ALERT_4_G | Model has Chirality at C63                       | (Sohnke SpGr) | S Verify |
| PLAT791_ALERT_4_G | Model has Chirality at C64                       | (Sohnke SpGr) | S Verify |
| PLAT791_ALERT_4_G | Model has Chirality at C67                       | (Sohnke SpGr) | R Verify |
| PLAT791_ALERT_4_G | Model has Chirality at C70                       | (Sohnke SpGr) | R Verify |
| PLAT860_ALERT_3_G | Number of Least-Squares Restraints .....         |               | 130 Note |
| PLAT941_ALERT_3_G | Average HKL Measurement Multiplicity .....       |               | 4.9 Low  |
| PLAT952_ALERT_5_G | Calculated (ThMax) and CIF-Reported lmax Differ. |               | 2 Units  |

---

0 **ALERT level A** = Most likely a serious problem - resolve or explain  
2 **ALERT level B** = A potentially serious problem, consider carefully  
5 **ALERT level C** = Check. Ensure it is not caused by an omission or oversight  
25 **ALERT level G** = General information/check it is not something unexpected

0 ALERT type 1 CIF construction/syntax error, inconsistent or missing data  
9 ALERT type 2 Indicator that the structure model may be wrong or deficient  
4 ALERT type 3 Indicator that the structure quality may be low  
18 ALERT type 4 Improvement, methodology, query or suggestion  
1 ALERT type 5 Informative message, check

---

It is advisable to attempt to resolve as many as possible of the alerts in all categories. Often the minor alerts point to easily fixed oversights, errors and omissions in your CIF or refinement strategy, so attention to these fine details can be worthwhile. In order to resolve some of the more serious problems it may be necessary to carry out additional measurements or structure refinements. However, the purpose of your study may justify the reported deviations and the more serious of these should normally be commented upon in the discussion or experimental section of a paper or in the "special\_details" fields of the CIF. checkCIF was carefully designed to identify outliers and unusual parameters, but every test has its limitations and alerts that are not important in a particular case may appear. Conversely, the absence of alerts does not guarantee there are no aspects of the results needing attention. It is up to the individual to critically assess their own results and, if necessary, seek expert advice.

### Publication of your CIF in IUCr journals

A basic structural check has been run on your CIF. These basic checks will be run on all CIFs submitted for publication in IUCr journals (*Acta Crystallographica*, *Journal of Applied Crystallography*, *Journal of Synchrotron Radiation*); however, if you intend to submit to *Acta Crystallographica Section C* or *E* or *IUCrData*, you should make sure that full publication checks are run on the final version of your CIF prior to submission.

### Publication of your CIF in other journals

Please refer to the *Notes for Authors* of the relevant journal for any special instructions relating to CIF submission.

---

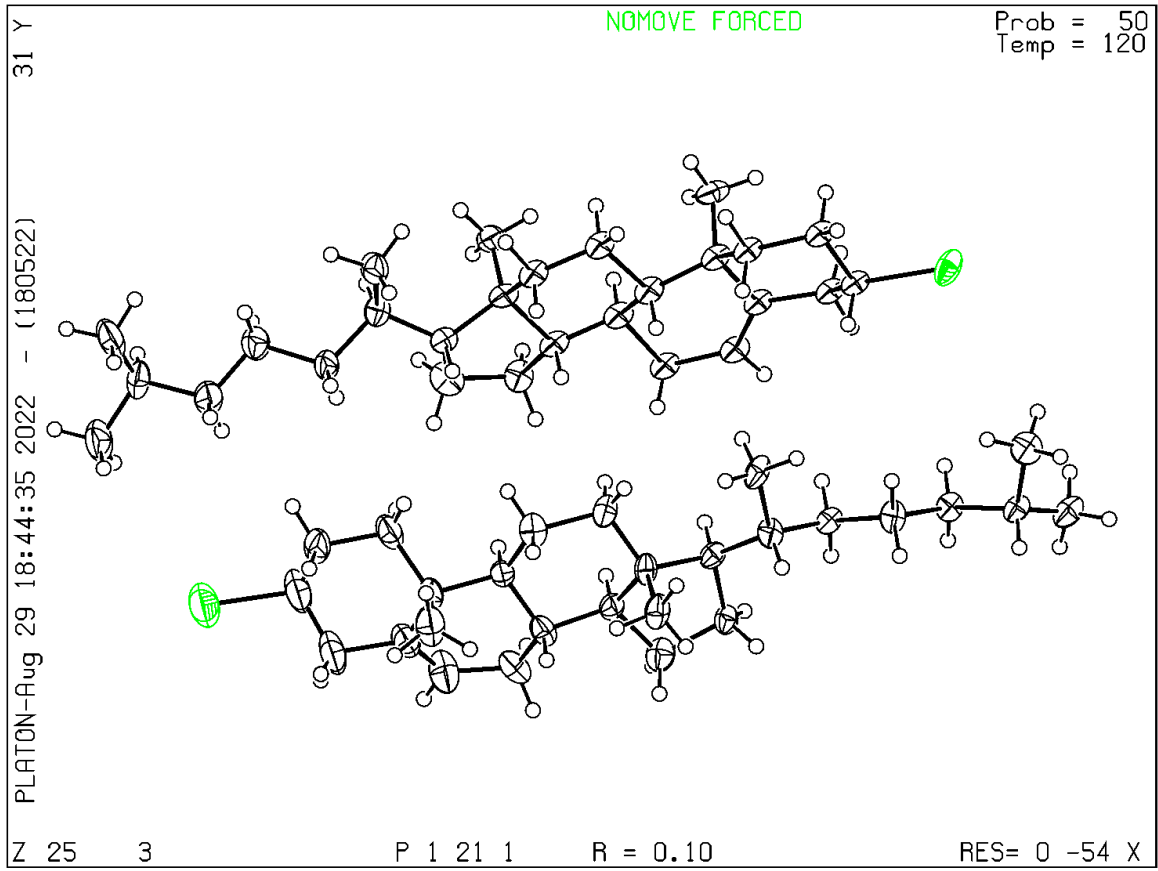

Supplement: Additional file 2 [file 1860-5397-19-9-S2.zip]
