# Supplementary material for: Revisiting the bromination of 3β-hydroxycholest-5-ene with CBr 4 /PPh 3 and the subsequent azidolysis of the resulting bromide, disparity in stereochemical behavior
Source: publisher site journal article supplement (doi:10.3762/bjoc.19.9), 2023-01-27
Supplement: Additional file 1 [file 1860-5397-19-9-S1.pdf]

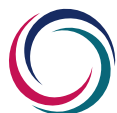

## Supporting Information

for

### Revisiting the bromination of 3 $\beta$ -hydroxycholest-5-ene with CBr<sub>4</sub>/PPh<sub>3</sub> and the subsequent azidolysis of the resulting bromide, disparity in stereochemical behavior

Christian Schumacher, Jas S. Ward, Kari Rissanen, Carsten Bolm  
and Mohamed Ramadan El Sayed Aly

*Beilstein J. Org. Chem.* **2023**, *19*, 91–99. doi:10.3762/bjoc.19.9

## X-ray crystallography and NMR spectra

## Table of Contents

|                          |     |
|--------------------------|-----|
| I. X-ray crystallography | S2  |
| II. NMR spectra          | S4  |
| III. References          | S26 |

## I. X-ray crystallography

Due to the known stereochemistry of the cholesterol skeleton there is no need for ab initio absolute structure determination (viz. based on the Flack parameter). Single-crystal X-ray data for diene **9** was measured using a Bruker-Nonius Kappa CCD diffractometer with an APEX-II detector with graphite-monochromatized Mo- $K\alpha$  ( $\lambda = 0.71073$  Å) radiation at 170 K. Data collection and reduction were performed using the program *COLLECT* [1] and *HKL DENZO AND SCALEPACK* [2], respectively, and the intensities were corrected for absorption using *SADABS* [3]. Single-crystal X-ray data for bromide **4** was measured using a Rigaku SuperNova dual-source Oxford diffractometer equipped with an Eos detector using mirror-monochromated Mo- $K\alpha$  ( $\lambda = 0.71073$  Å) radiation at 120 K. The data collection and reduction were performed using the program *CrysAlisPro* and Gaussian face index absorption correction method was applied [4]. The structures were solved with intrinsic phasing (SHELXT) [5] and refined by full-matrix least squares on  $F^2$  using the *OLEX2* software [6], which utilizes the *SHELXL* module [7]. For the azide **5** only a partial data collection was performed (see below) verifying the structure to be the known azide, 3 $\alpha$ -azidocholest-5-ene [8].

### Crystal data for the diene **9**

C<sub>27</sub>H<sub>44</sub>,  $M = 368.62$ , colourless block,  $0.24 \times 0.30 \times 0.40$  mm, orthorhombic, space group  $P2_12_12_1$ ,  $a = 7.5850(2)$  Å,  $b = 15.9238(4)$  Å,  $c = 19.4795(4)$  Å,  $V = 2352.77(10)$  Å<sup>3</sup>,  $Z = 4$ ,  $D_{\text{calc}} = 1.041$  gcm<sup>-3</sup>,  $F000 = 824$ ,  $\mu = 0.06$  mm<sup>-1</sup>,  $T = 170(1)$  K,  $\theta_{\text{max}} = 28.7^\circ$ , 5169 total reflections, 3861 with  $I_o > 2\sigma(I_o)$ ,  $R_{\text{int}} = 0.052$ , 5169 data, 249 parameters, no restraints, GooF = 1.03,  $0.28 < d\Delta\rho < -0.17$  eÅ<sup>-3</sup>,  $R[F^2 > 2\sigma(F^2)] = 0.053$ ,  $wR(F^2) = 0.131$ . CCDC-2204245.

### Crystal data for the bromide **4**

C<sub>27</sub>H<sub>45</sub>Br,  $M = 449.54$ , colourless plate,  $0.06 \times 0.17 \times 0.25$  mm<sup>3</sup>, monoclinic, space group  $P2_1$ ,  $a = 11.4127(12)$  Å,  $b = 7.5896(9)$  Å,  $c = 28.603(5)$  Å,  $\beta = 90.077(13)^\circ$ ,  $V = 2477.5(6)$  Å<sup>3</sup>,  $Z = 4$ ,  $D_{\text{calc}} = 1.205$  gcm<sup>-3</sup>,  $F000 = 968$ ,  $\mu = 1.67$  mm<sup>-1</sup>,  $T = 120.0(1)$  K,  $\theta_{\text{max}} = 25.8^\circ$ , 11562 total reflections, 5812 with  $I_o > 2\sigma(I_o)$ ,  $R_{\text{int}} = 0.109$ , 11562 data, 467 parameters, 130 restraints, GooF = 1.06,  $1.51 < d\Delta\rho < -1.68$  eÅ<sup>-3</sup>,  $R[F^2 > 2\sigma(F^2)] = 0.098$ ,  $wR(F^2) = 0.309$ . CCDC-2204246.

### Verification of the structure of the azide **5**

The physical habit (colorless plates), the unit cell ( $a = 13.2746(14)$  Å,  $b = 6.1854(6)$  Å,  $c = 14.9159(15)$  Å,  $\beta = 93.285(9)^\circ$ ,  $V = 1222.7(2)$  Å<sup>3</sup>) and the space group ( $P2_1$ ) matched that previously reported for 3 $\alpha$ -azidocholest-5-ene [8]. A partial (30%) data set was collected and a figure base on it is shown in (Figure S1) confirming the studied sample to be the 3 $\alpha$ -azidocholest-5-ene.

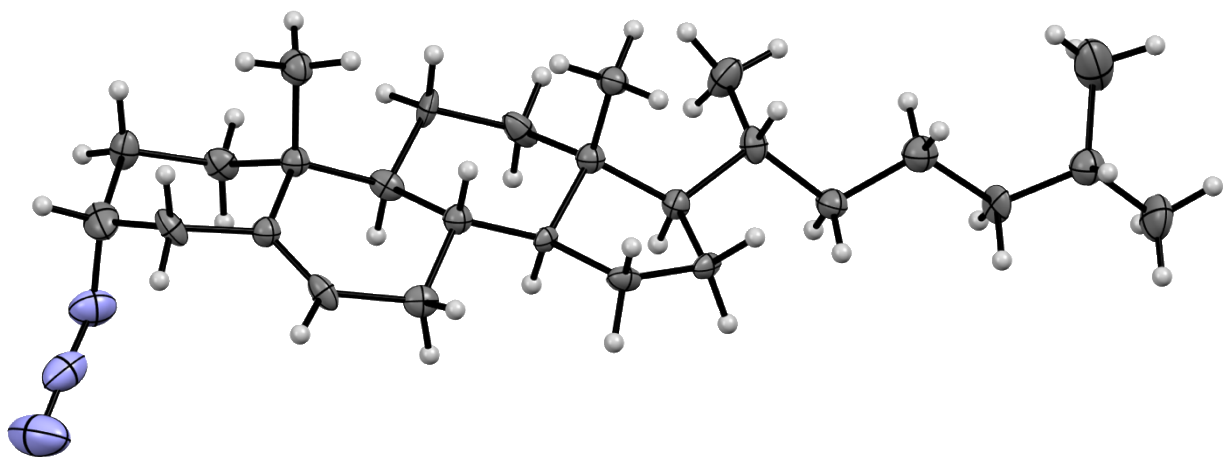

**Fig. S1.** The ORTEP plot of the 3 $\alpha$ -azidocholest-5-ene from a partial data set with thermal displacement parameter at 50% probability level.

## II. NMR spectra

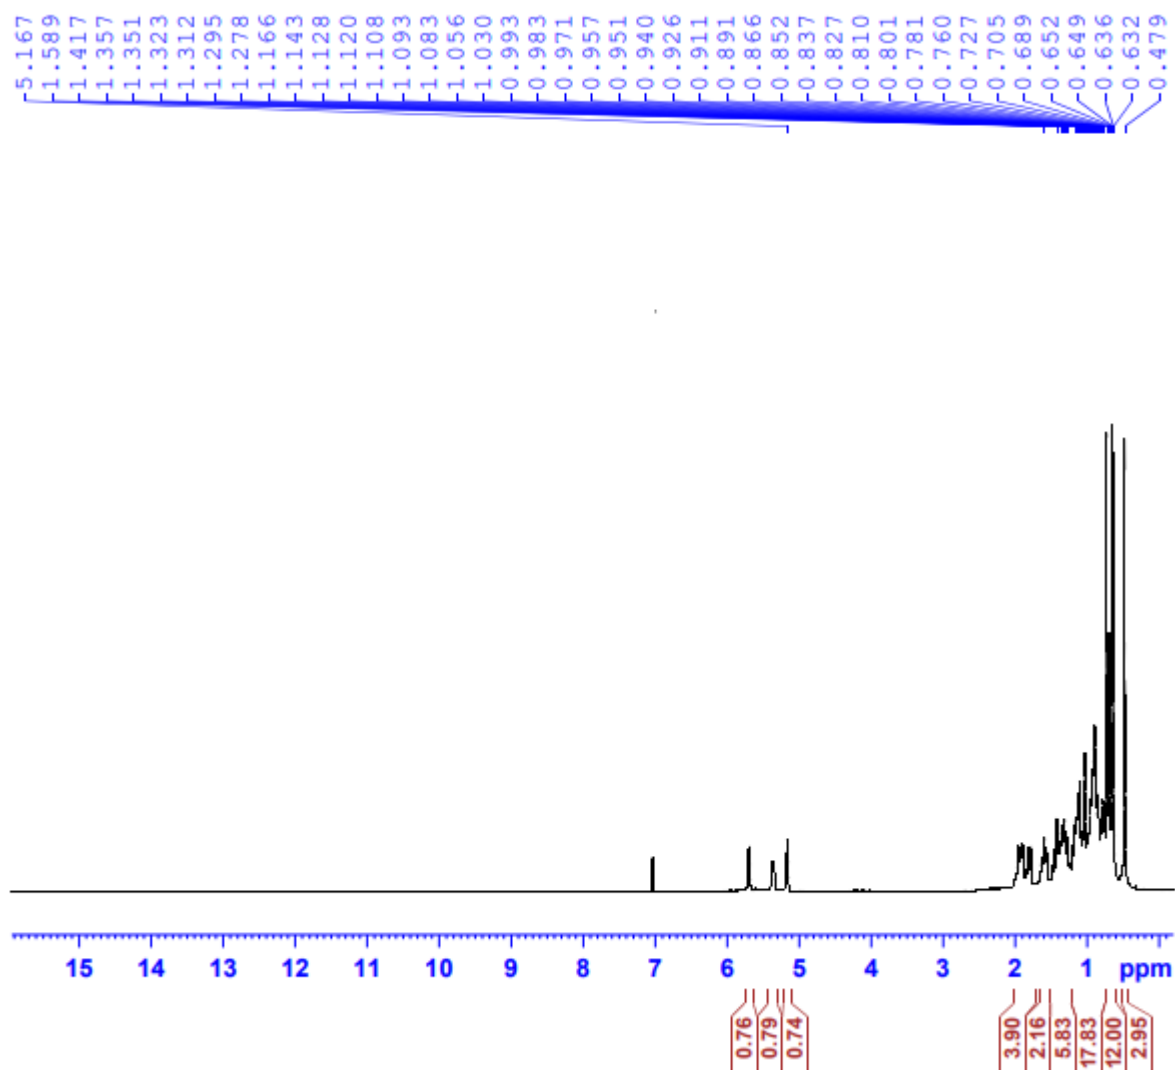

**Fig. S2.**  $^1\text{H}$  NMR spectrum (400 MHz,  $\text{CDCl}_3$ ) of compound **9**. A spectrum for this compound was previously published in [9], but incorrectly assigned to  $3\alpha$ -bromocholest-5-ene.

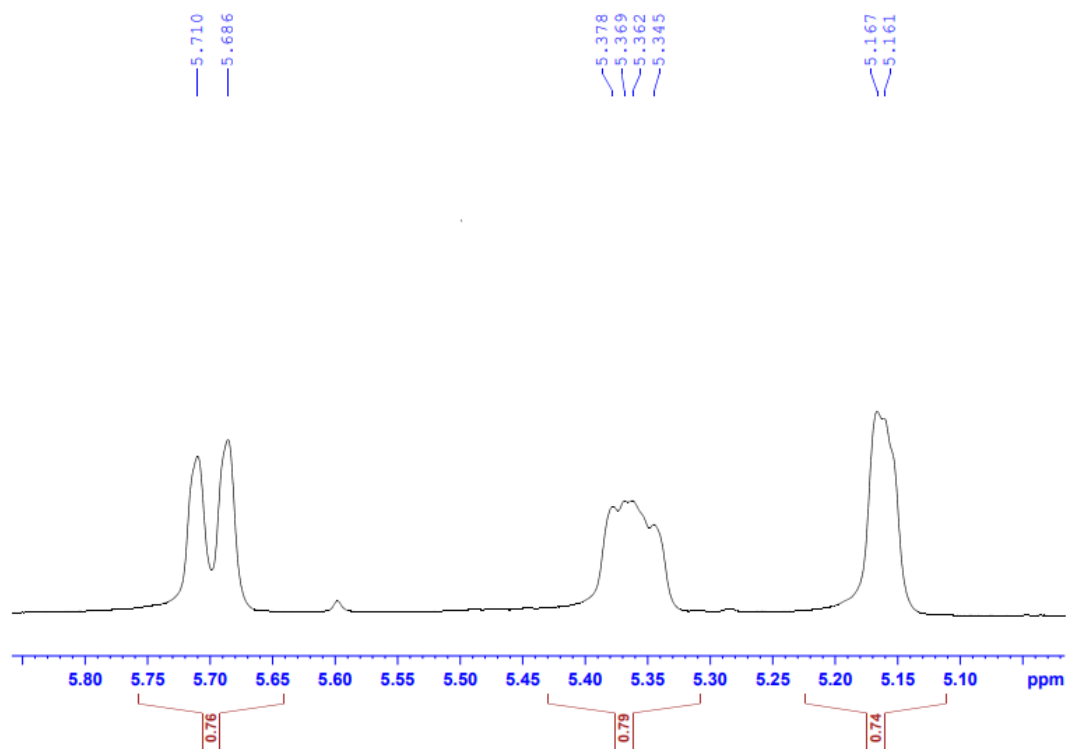

**Fig. S3.** Cross-section in the  $^1\text{H}$  NMR spectrum (400 MHz,  $\text{CDCl}_3$ ) of compound **9**.

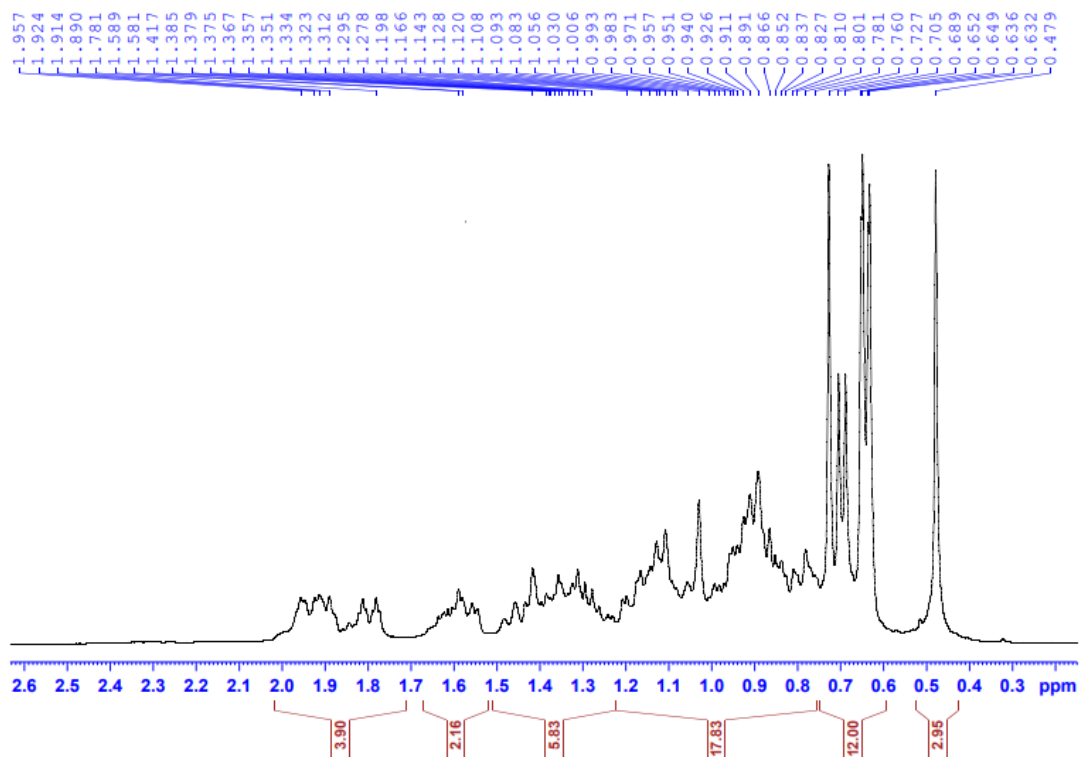

**Fig. S4.** Cross-section in the  $^1\text{H}$  NMR spectrum (400 MHz,  $\text{CDCl}_3$ ) of compound **9**.

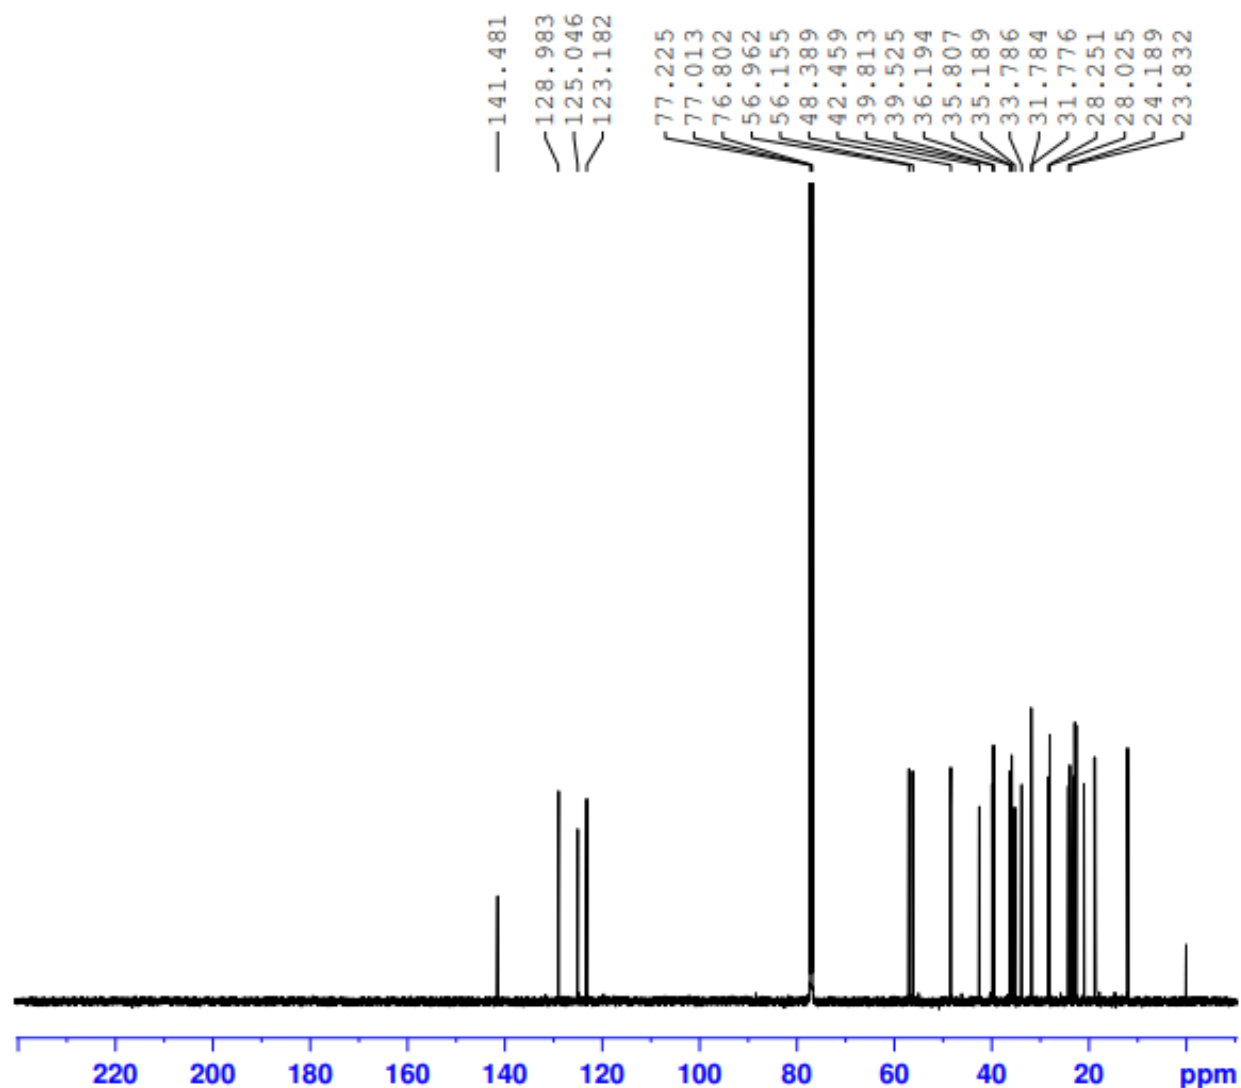

**Fig. S5.**  $^{13}\text{C}$   $\{^1\text{H}\}$  NMR spectrum (150 MHz,  $\text{CDCl}_3$ ) of compound **9**. This spectrum was slightly adapted from [9] (“Synthesis, antimicrobial and cytotoxicity evaluation of new cholesterol congeners”, © 2015 M. R. E. S. Aly et al., published by the Beilstein-Institut, distributed under the terms of the Creative Commons Attribution 2.0 Generic License, <https://creativecommons.org/licenses/by/2.0>). This spectrum was incorrectly assigned to  $3\alpha$ -bromocholest-5-ene in [9].

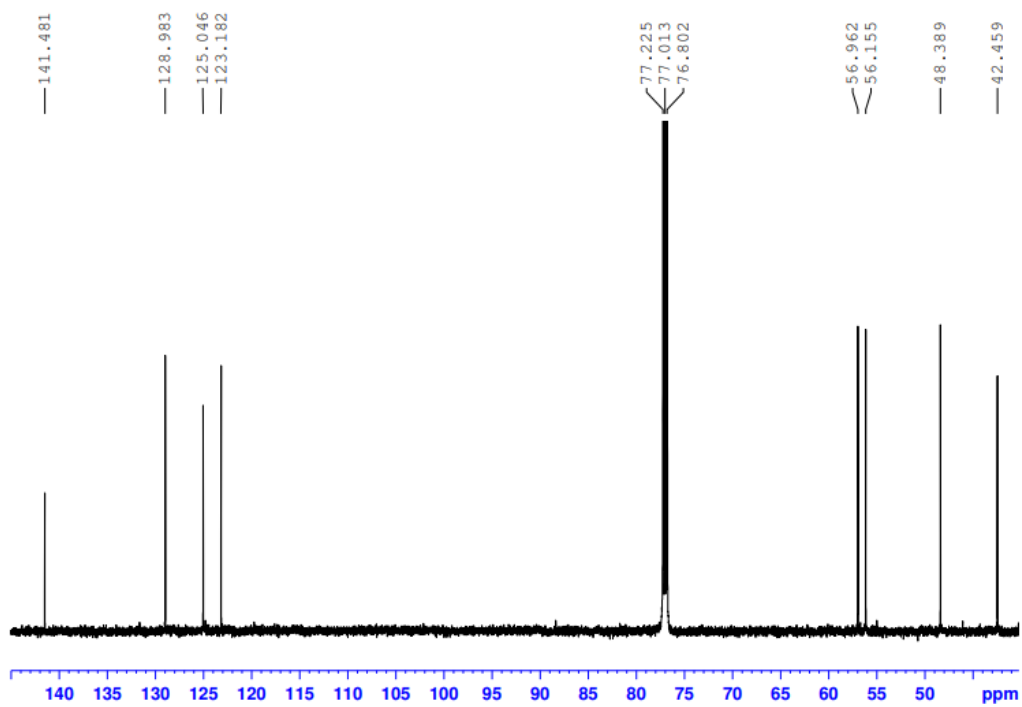

**Fig. S6.** Cross-section in the  $^{13}\text{C} \{^1\text{H}\}$  NMR spectrum of compound **9**.

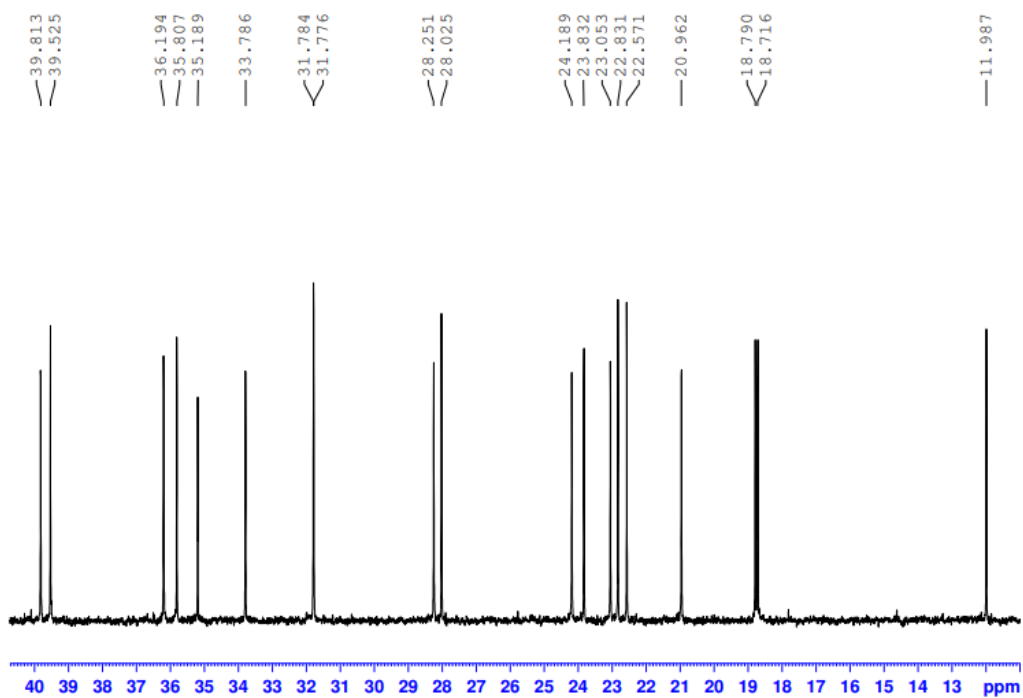

**Fig. S7.** Cross-section in the  $^{13}\text{C} \{^1\text{H}\}$  NMR spectrum of compound **9**.



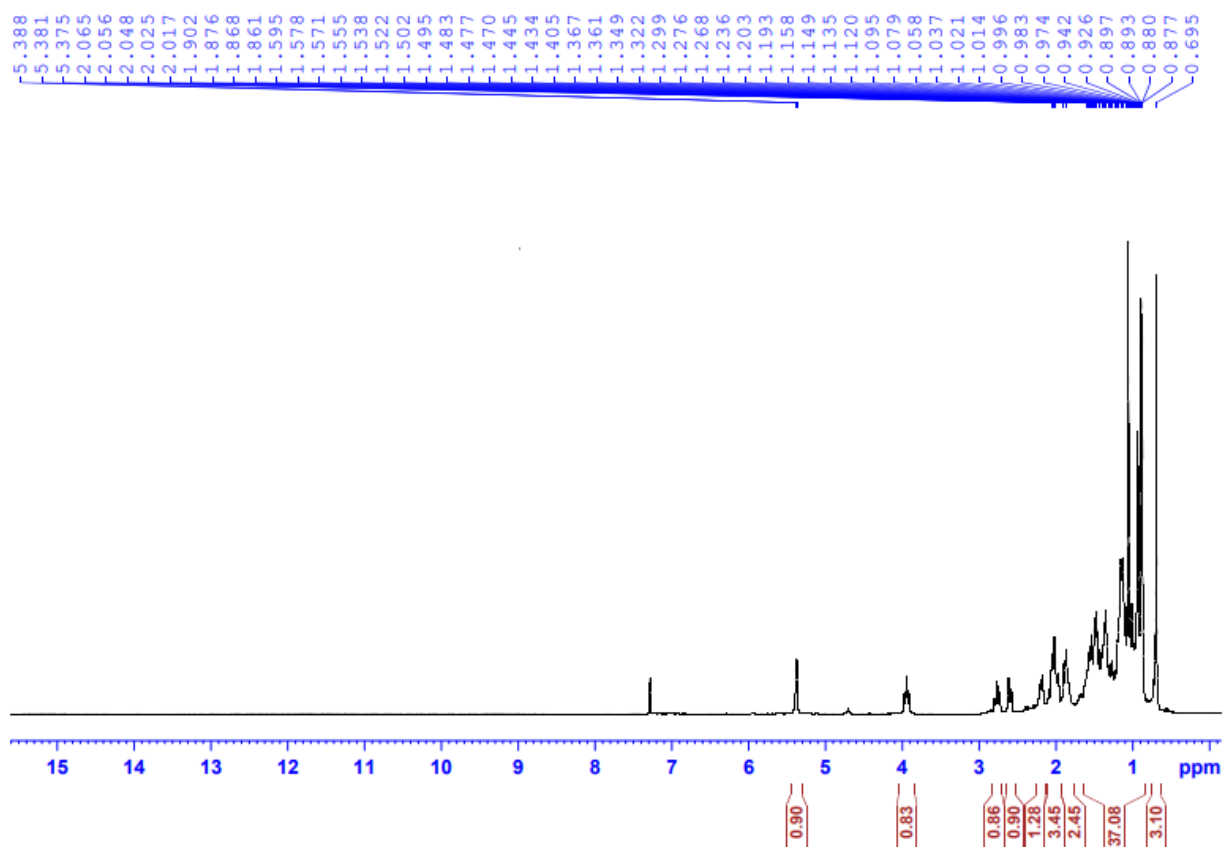

**Fig. S8.**  $^1\text{H}$  NMR spectrum (400 MHz,  $\text{CDCl}_3$ ) of compound **4**.

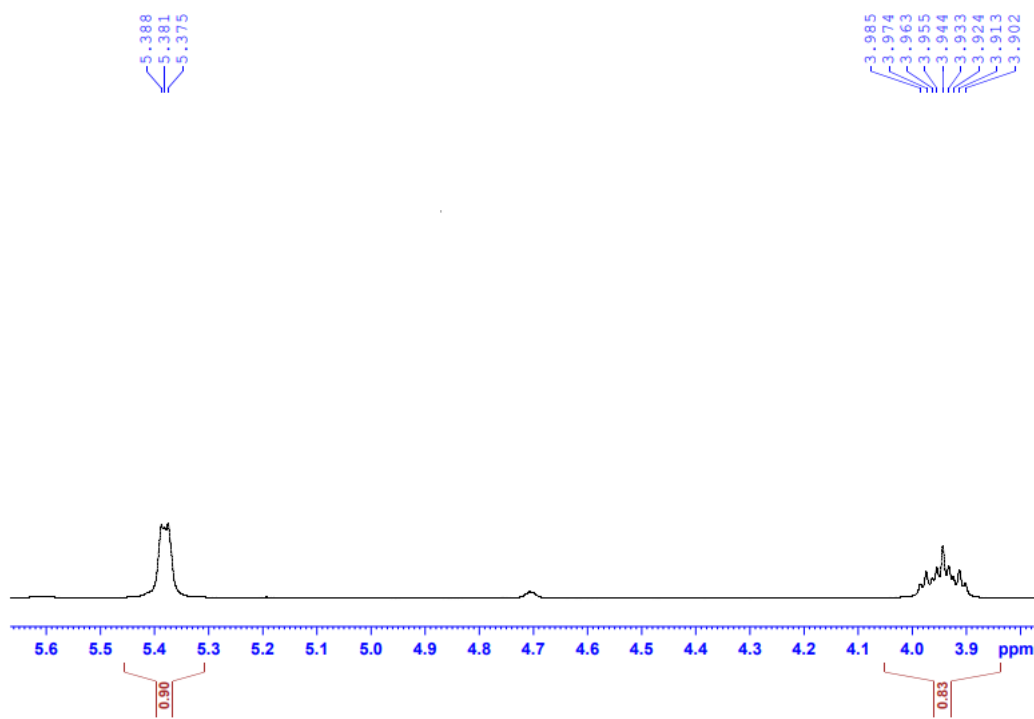

**Fig. S9.** Cross-section in the  $^1\text{H}$  NMR spectrum of compound **4**.

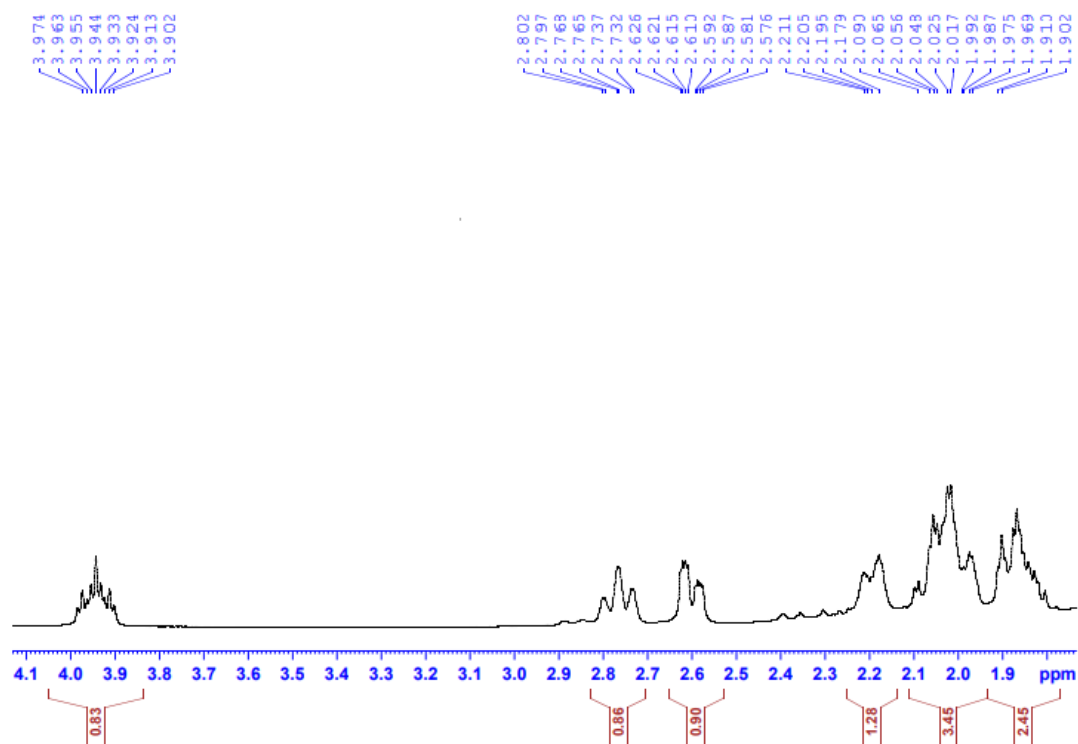

**Fig. S10.** Cross-sections in the  $^1\text{H}$  NMR spectrum of compound **4**.

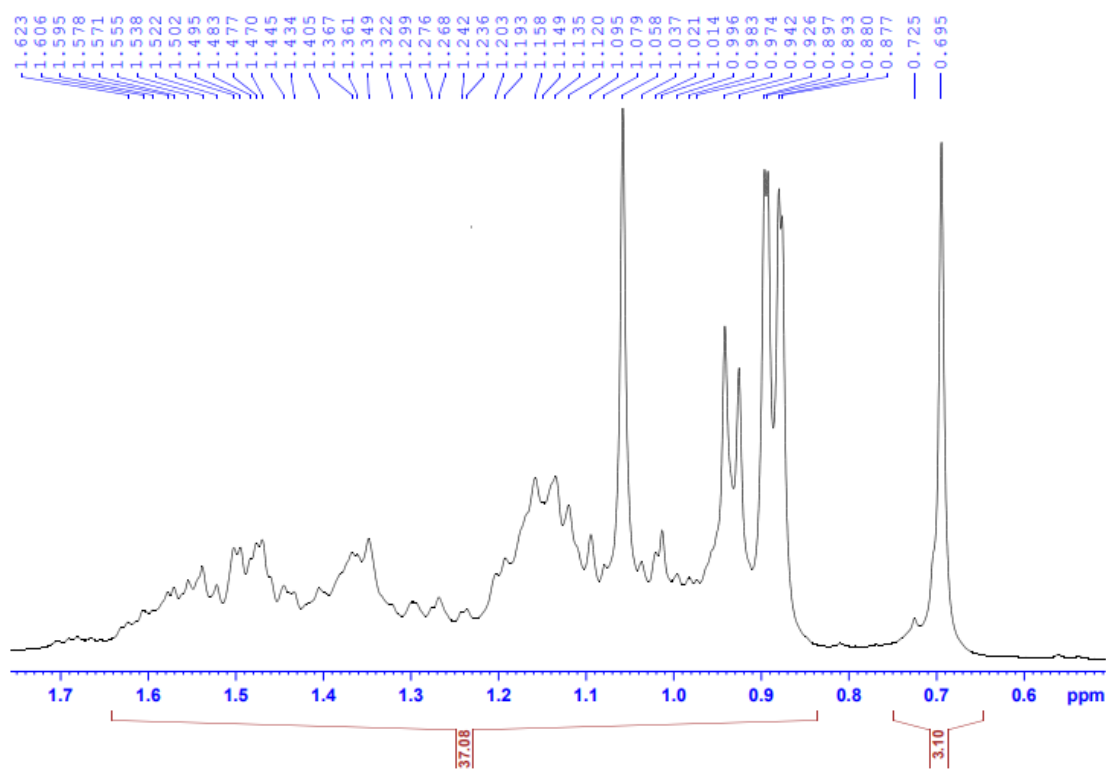

**Fig. S11.** Cross-sections in the  $^1\text{H}$  NMR spectrum of compound **4**.

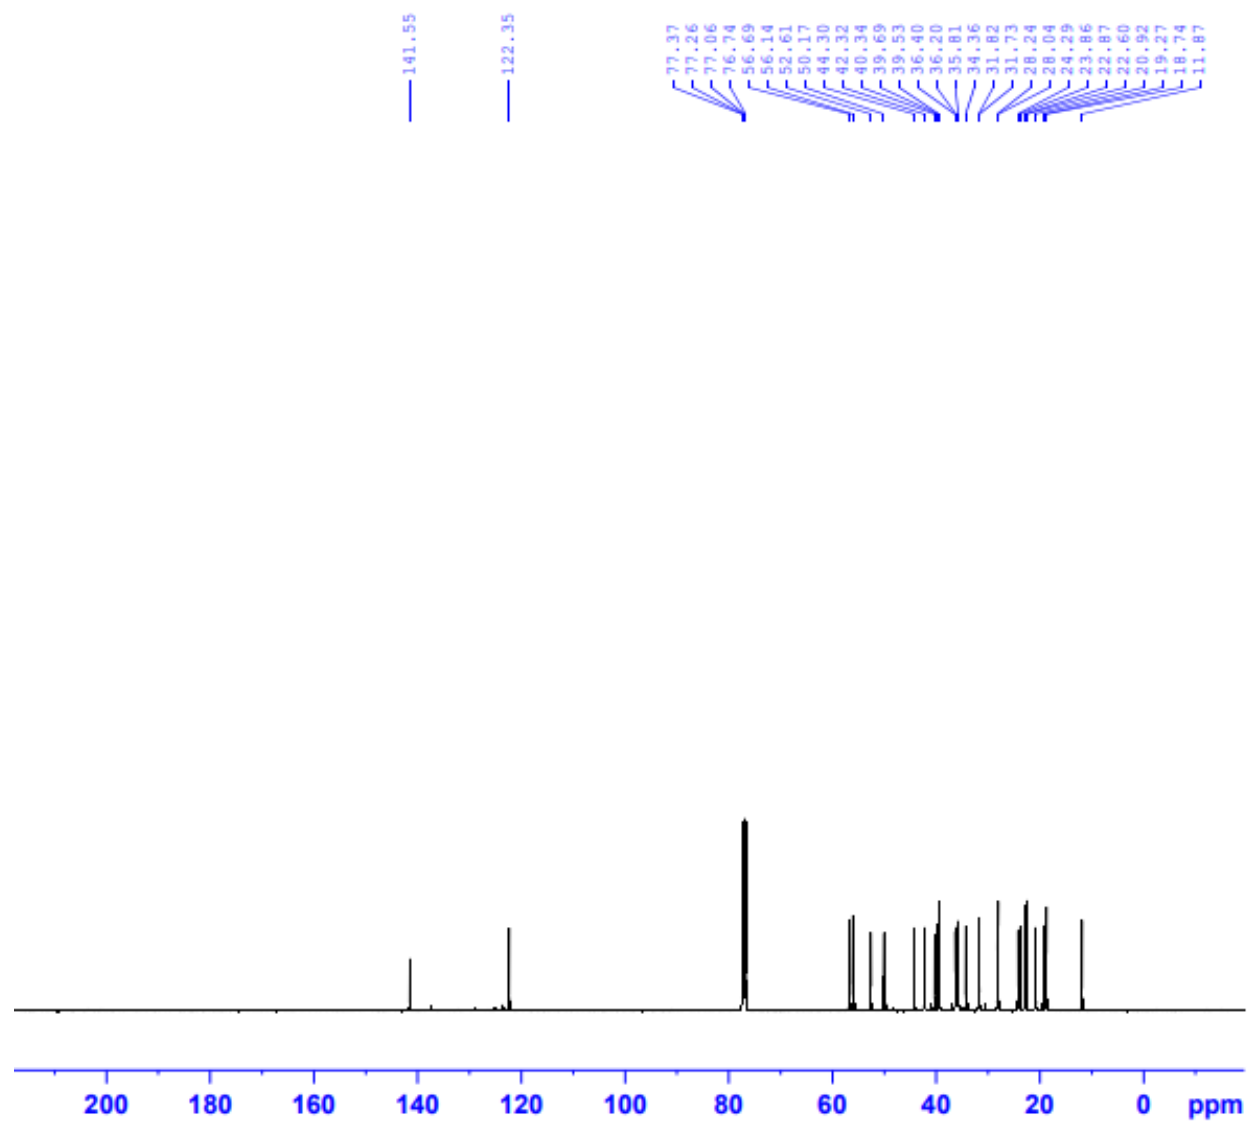

**Fig. S12.**  $^{13}\text{C}$  { $^1\text{H}$ } NMR spectrum (100 MHz,  $\text{CDCl}_3$ ) of compound 4.

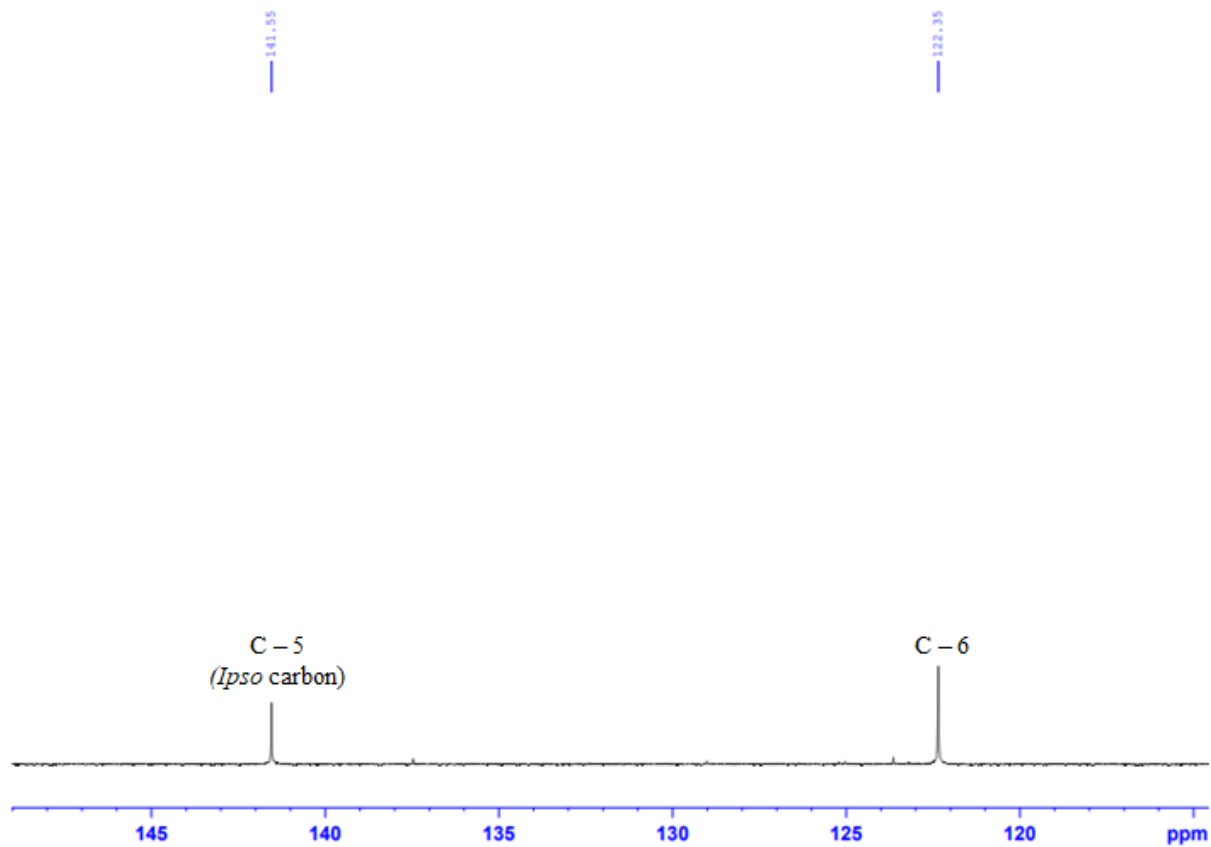

**Fig. S13.** Cross-section in the  $^{13}\text{C}$   $\{^1\text{H}\}$  NMR spectrum (100 MHz,  $\text{CDCl}_3$ ) of compound 4.

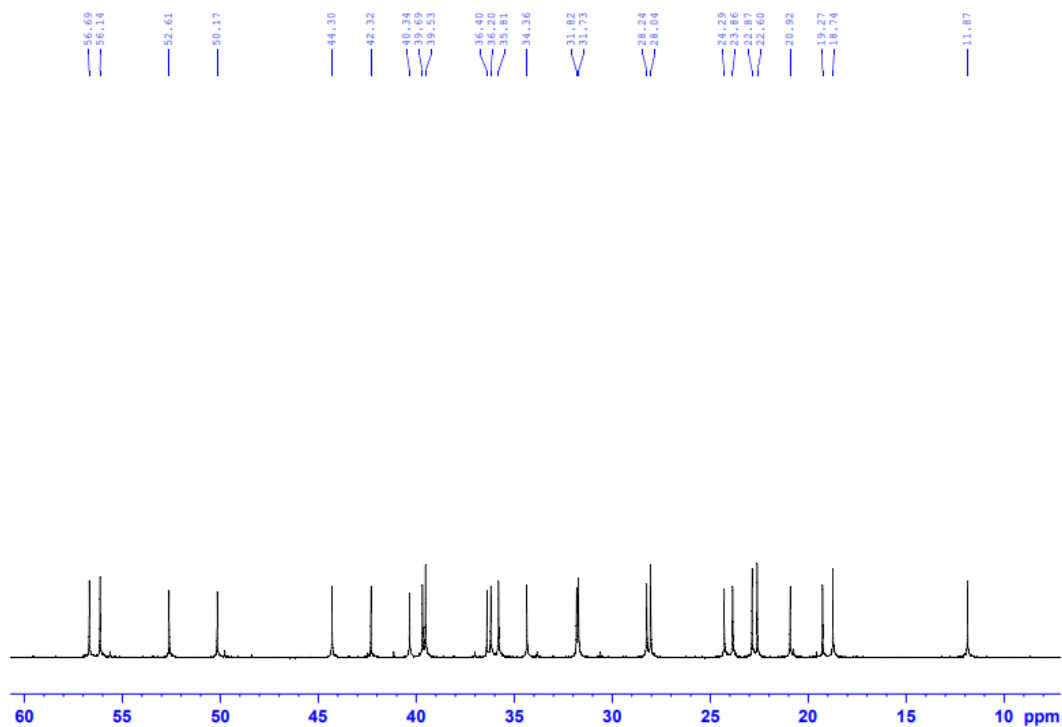

**Fig. S14.** Cross-section in the  $^{13}\text{C}$   $\{^1\text{H}\}$  NMR spectrum (100 MHz,  $\text{CDCl}_3$ ) of compound 4.

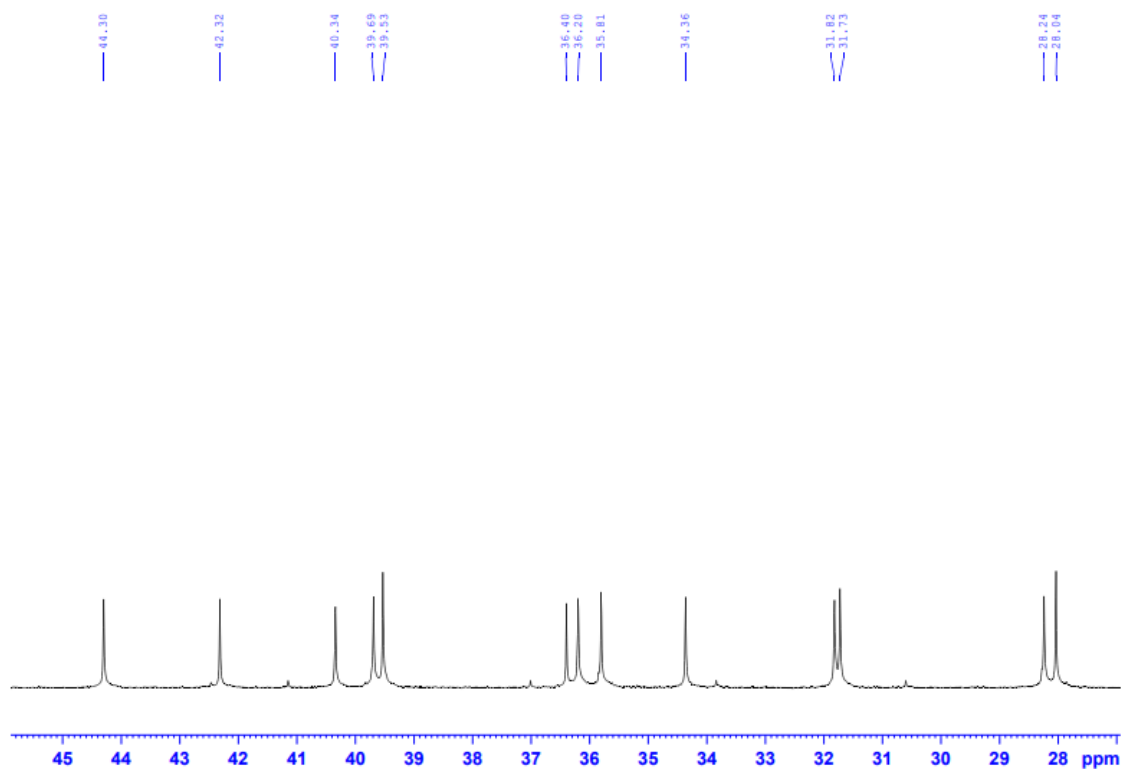

**Fig. S15.** Cross-section in the  $^{13}\text{C}$  { $^1\text{H}$ } NMR spectrum (100 MHz,  $\text{CDCl}_3$ ) of compound **4**.

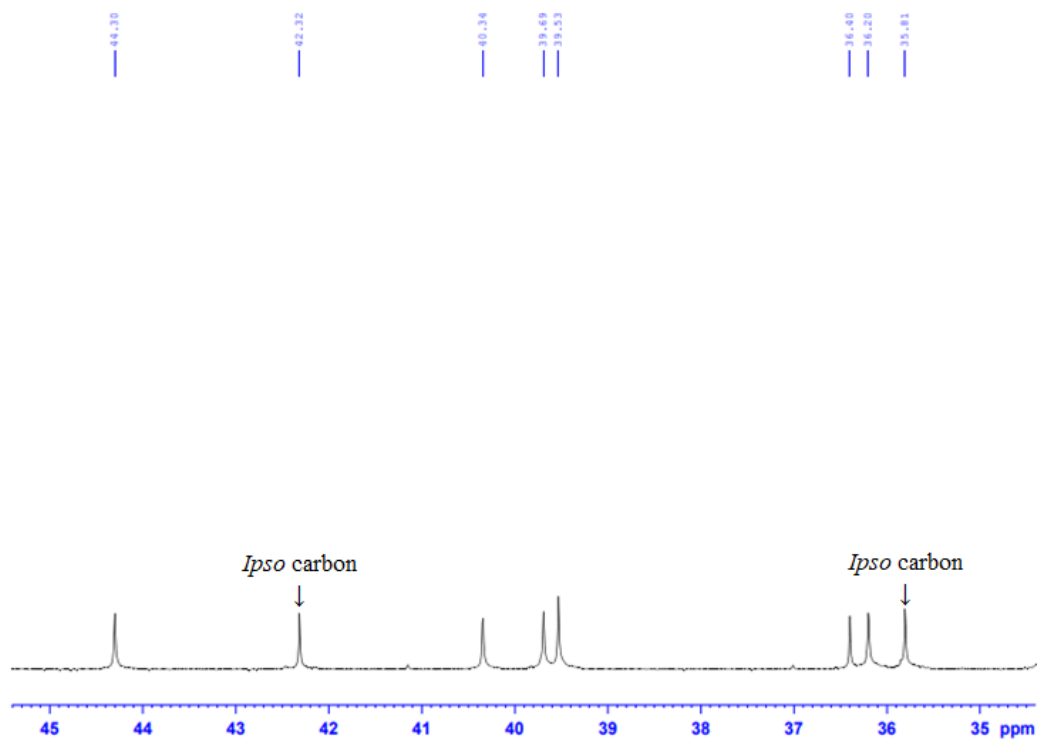

**Fig. S16.** Cross-section in the  $^{13}\text{C}$  { $^1\text{H}$ } NMR spectrum (100 MHz,  $\text{CDCl}_3$ ) of compound **4**.

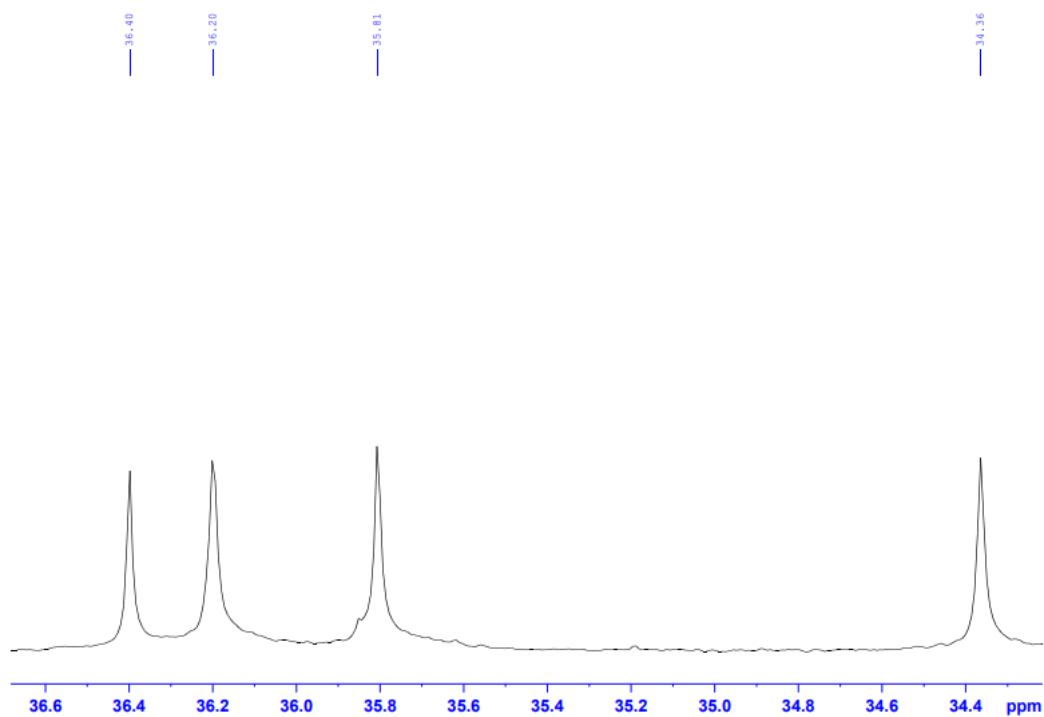

**Fig. S17.** Cross-section in the  $^{13}\text{C}$  { $^1\text{H}$ } NMR spectrum (100 MHz,  $\text{CDCl}_3$ ) of compound **4**.

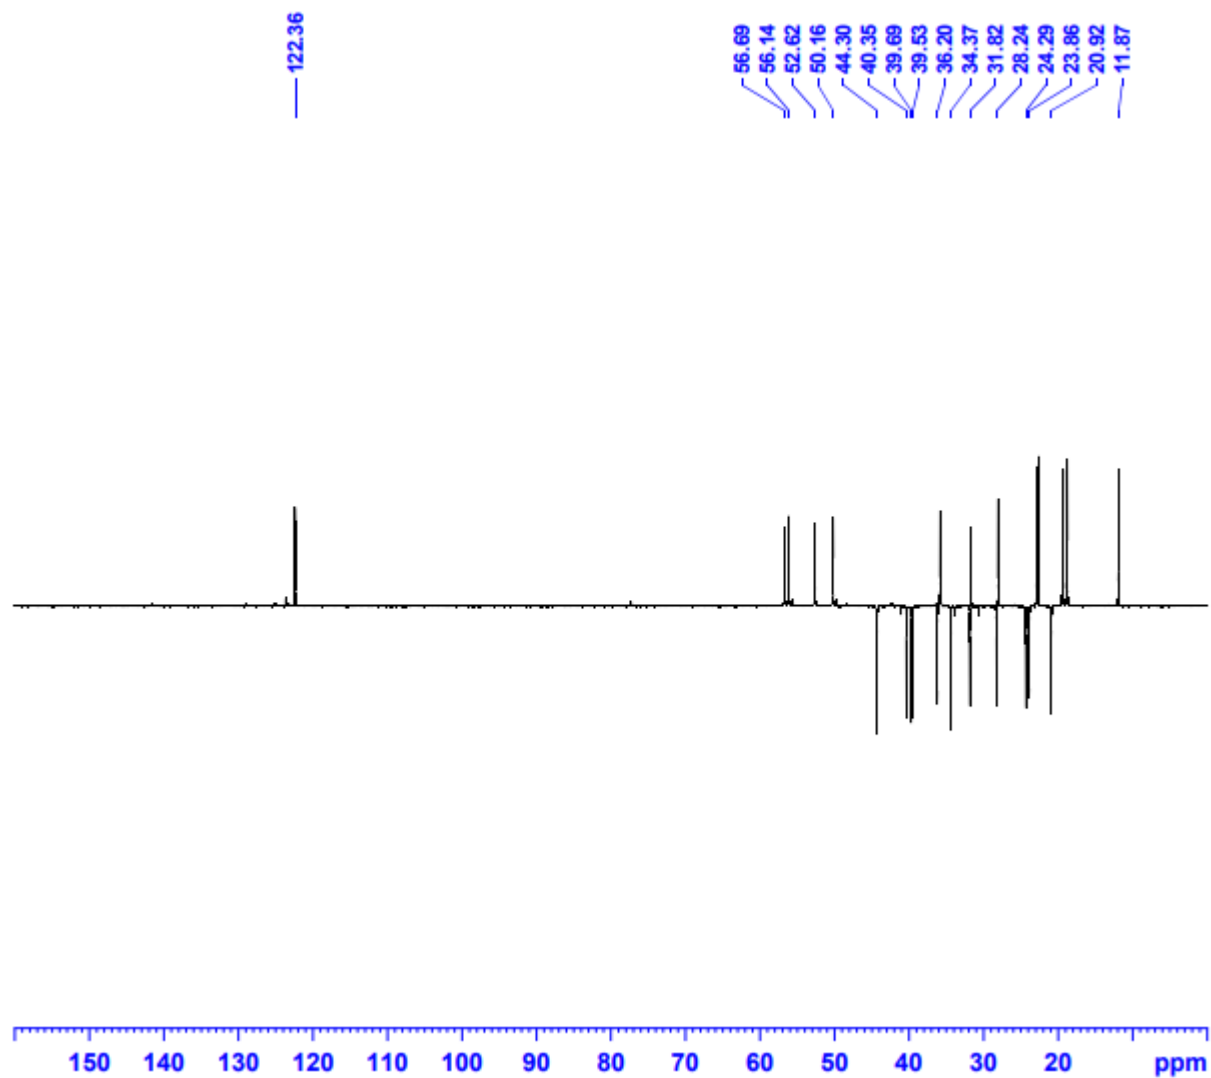

**Fig. S18.** DEPT-135° spectrum (100 MHz, CDCl<sub>3</sub>) of compound **4**.

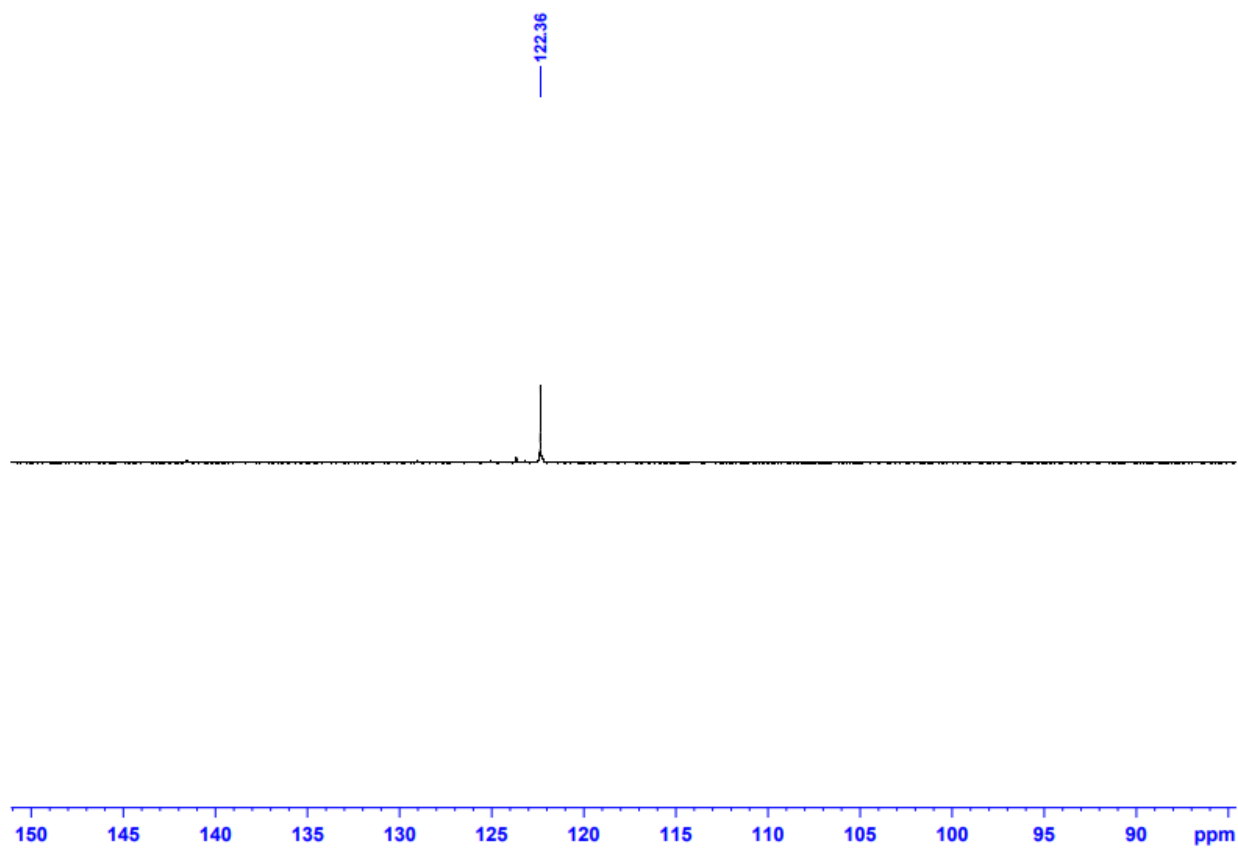

**Fig. S19.** Cross-section in the DEPT-135° spectrum (100 MHz, CDCl<sub>3</sub>) of compound **4**.



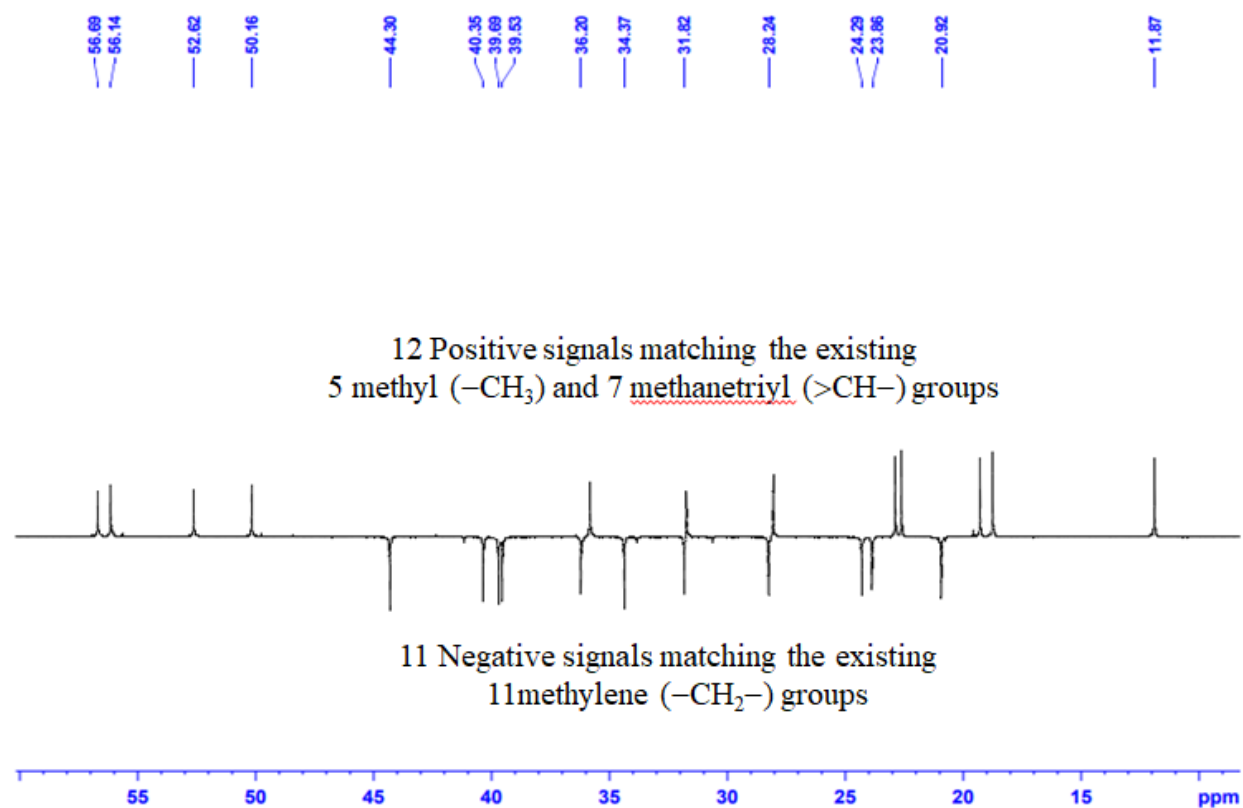

**Fig. S20.** Cross-section in the DEPT-135° spectrum (100 MHz,  $\text{CDCl}_3$ ) of compound **4**.

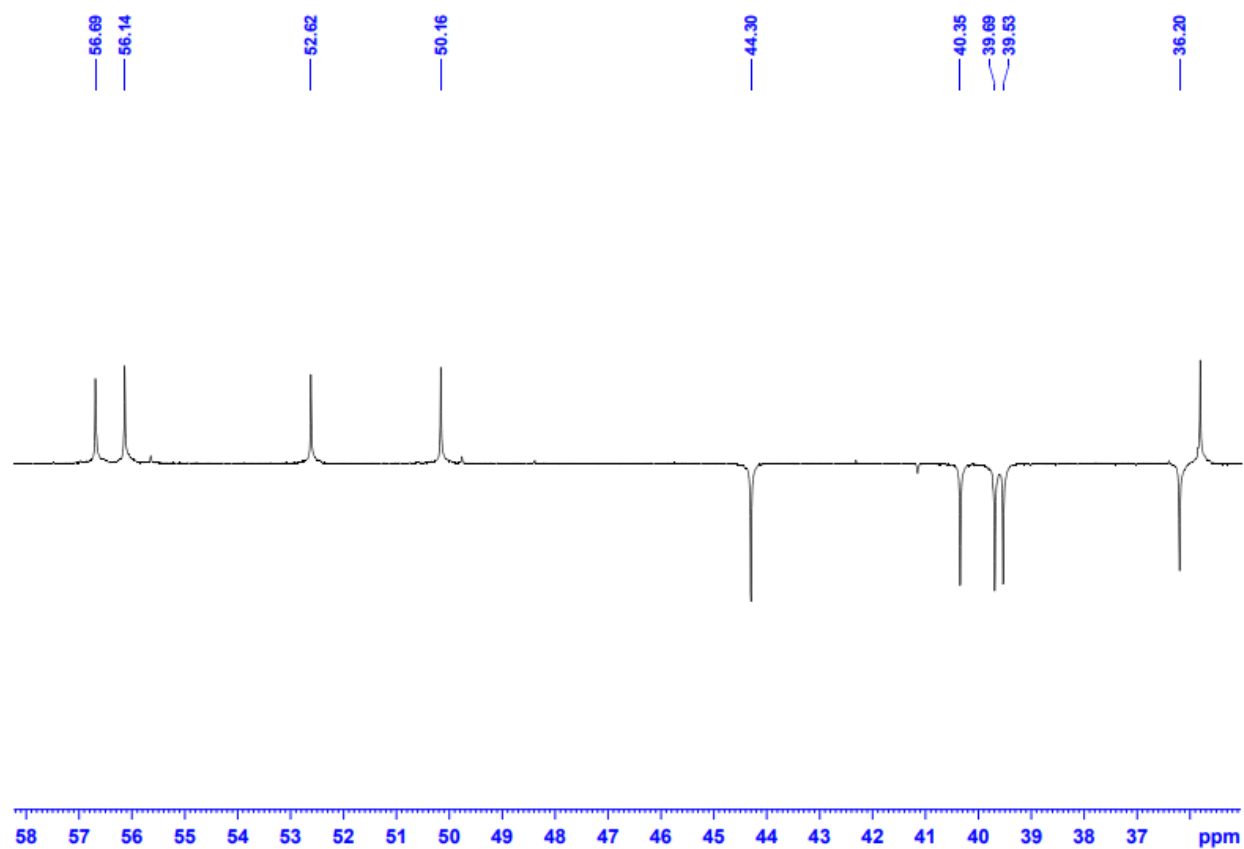

**Fig. S21.** Cross-section in the DEPT-135° spectrum (100 MHz, CDCl<sub>3</sub>) of compound **4**.

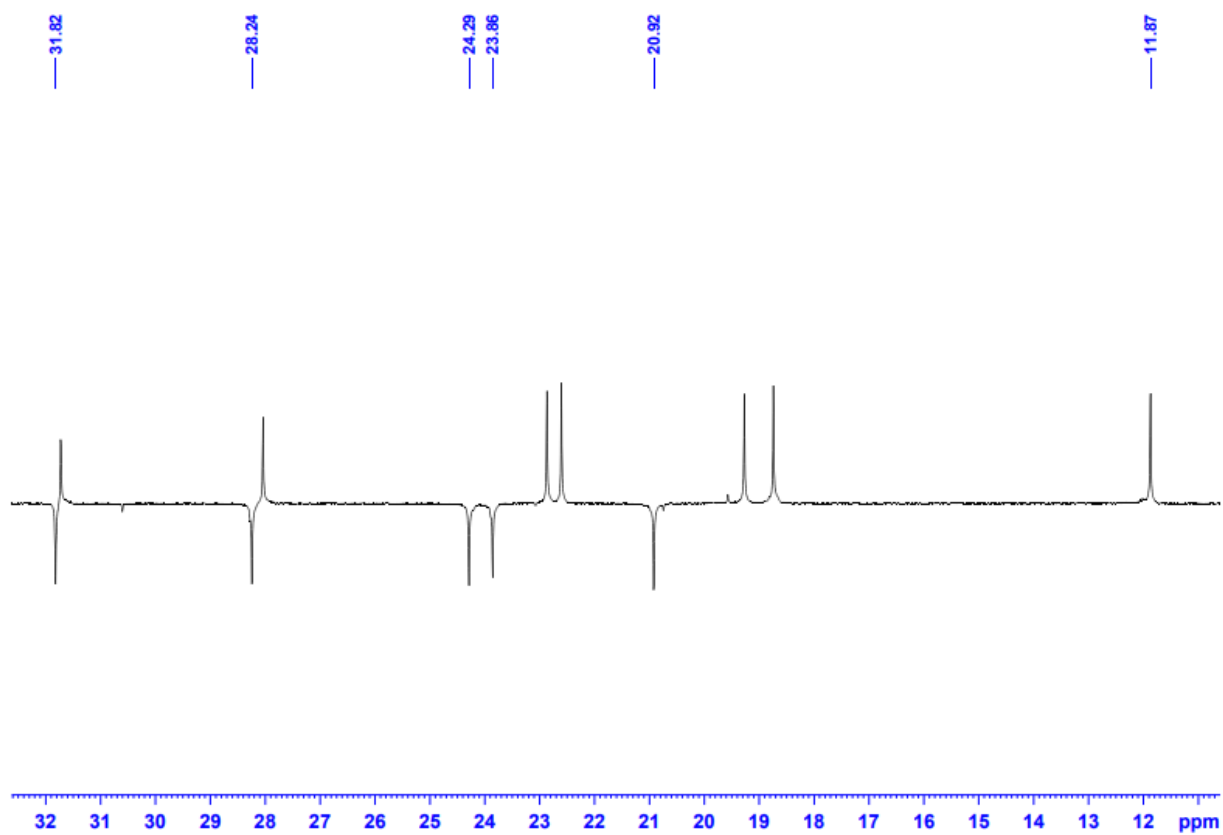

**Fig. S22.** Cross-section in the DEPT-135° spectrum (100 MHz, CDCl<sub>3</sub>) of compound **4**.

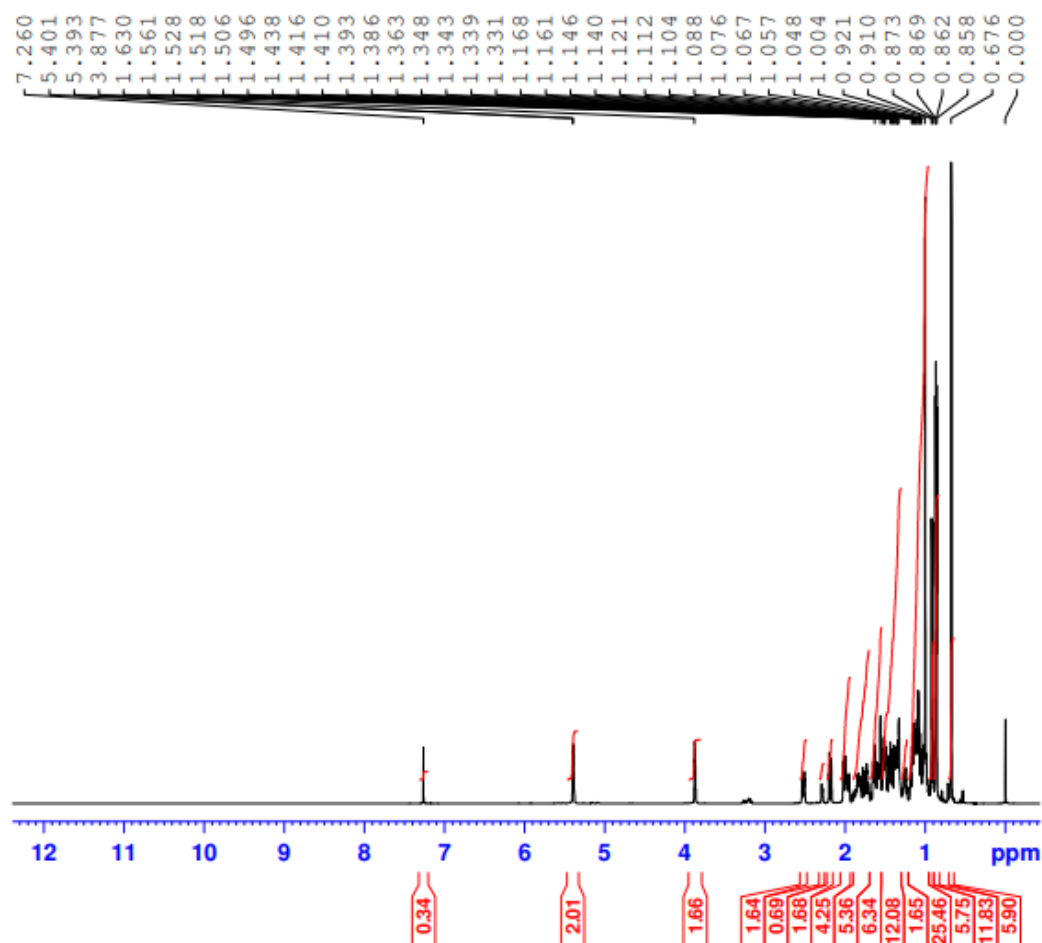

**Fig. S23.**  $^1\text{H}$  NMR spectrum (600 MHz,  $\text{CDCl}_3$ ) of compound **5**. This spectrum was slightly adapted from [9] (“Synthesis, antimicrobial and cytotoxicity evaluation of new cholesterol congeners”, © 2015 M. R. E. S. Aly et al., published by the Beilstein-Institut, distributed under the terms of the Creative Commons Attribution 2.0 Generic License, <https://creativecommons.org/licenses/by/2.0>). This spectrum was incorrectly assigned to  $3\beta$ -azidocholest-5-ene in [9]. The weak signal at  $\delta = 3.20$  (H-3 $\beta$ ) belongs to the  $\beta$ -epimer (ca. 15%) [10].

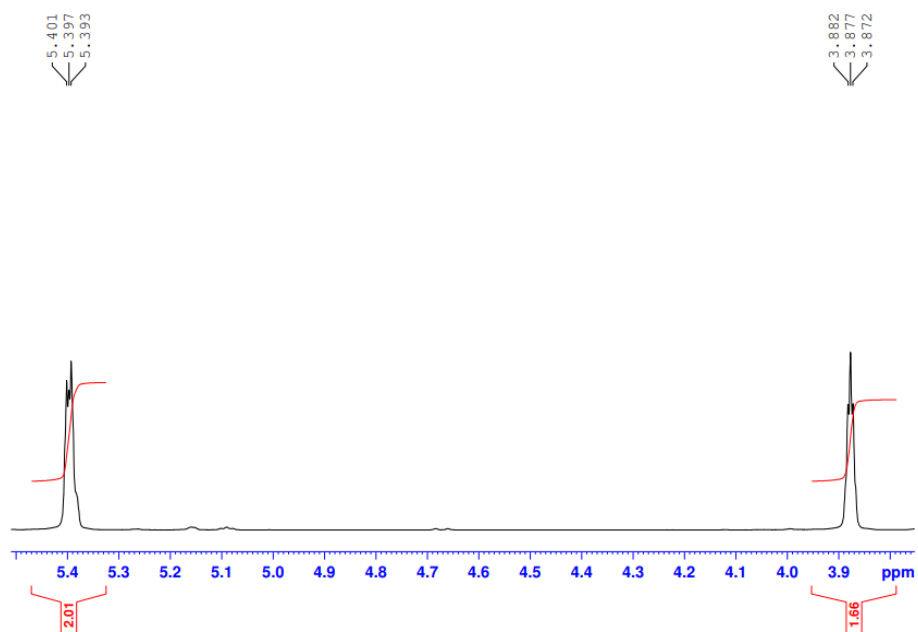

**Fig. S24.** Cross-section in the  $^1\text{H}$  NMR spectrum of compound **5**.

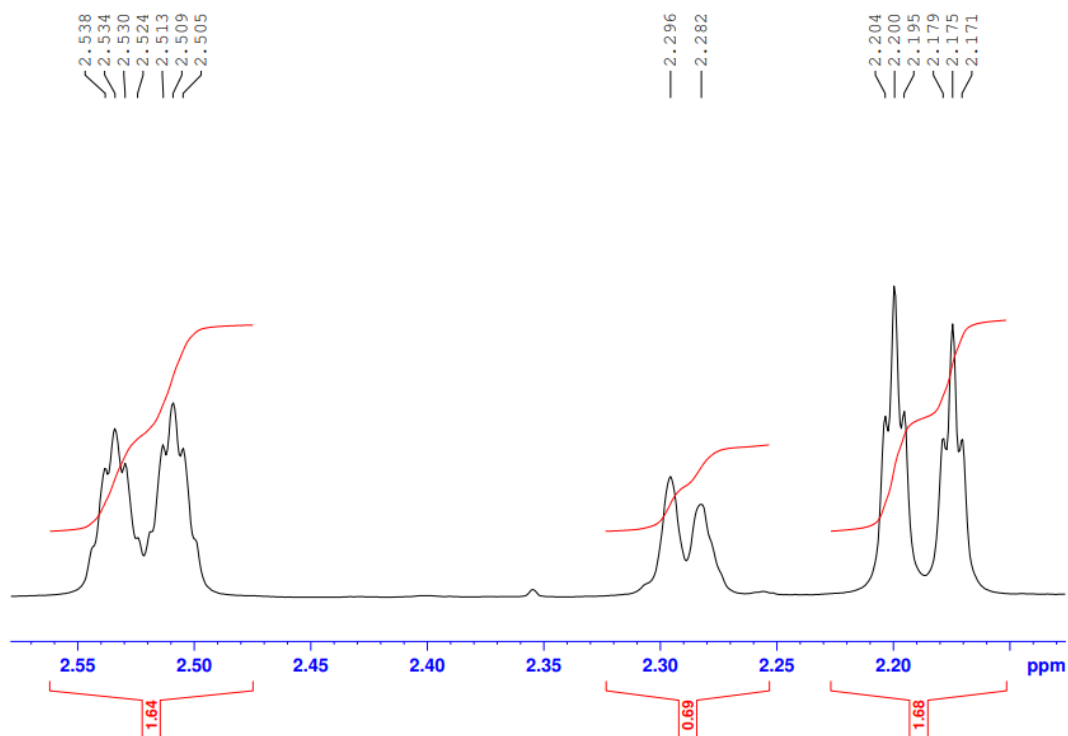

**Fig. S25.** Cross-section in the  $^1\text{H}$  NMR spectrum of compound **5**. The signal at  $\delta = 2.28$  ppm arise from two protons of the  $\beta$ -epimer (ca. 15%) [10].

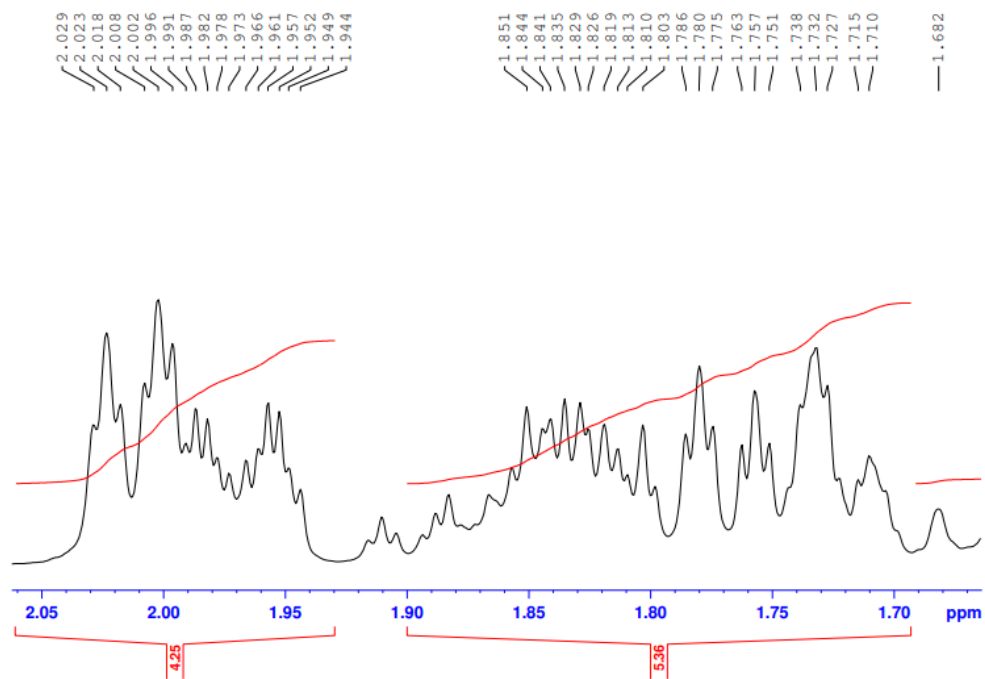

**Fig. S26.** Cross-section in the  $^1\text{H}$  NMR spectrum of compound **5**.

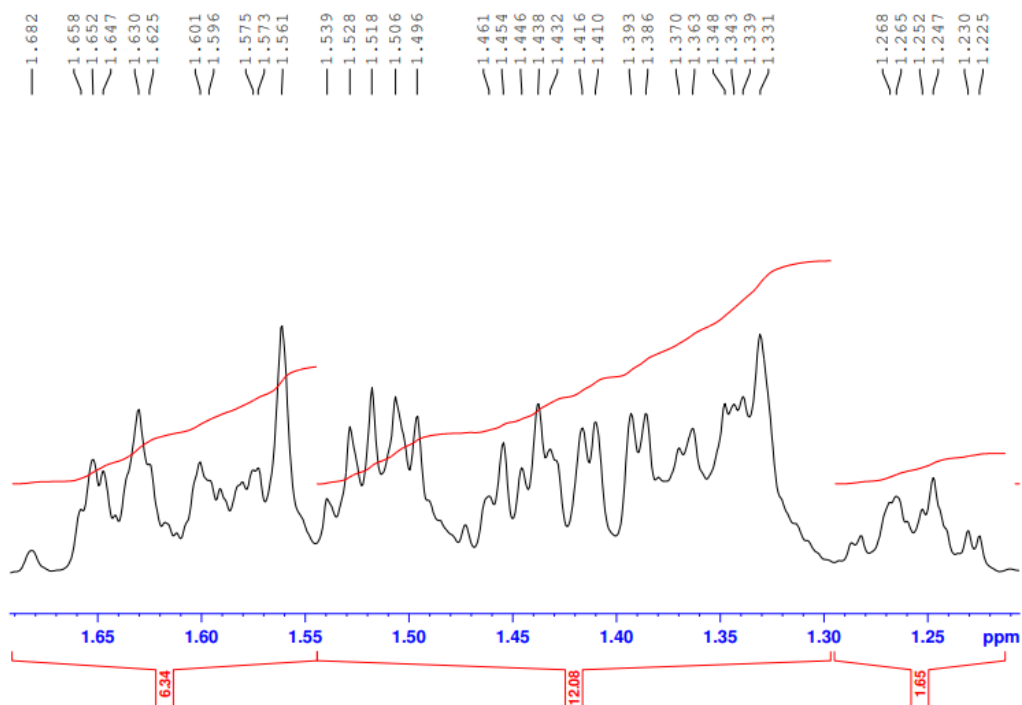

**Fig. S27.** Cross-section in the  $^1\text{H}$  NMR spectrum of compound **5**.

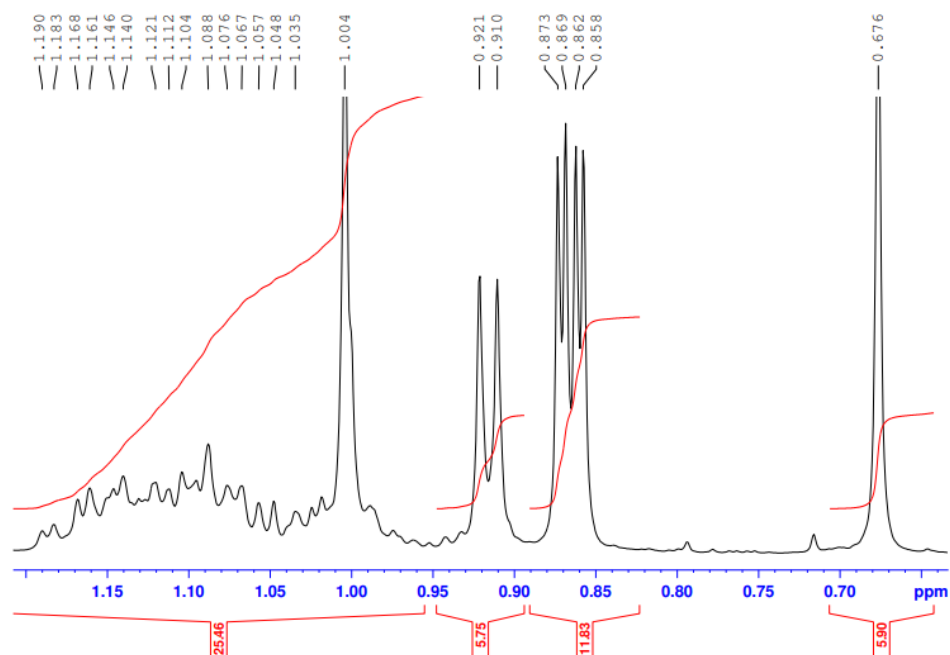

**Fig. S28.** Cross-section in the  $^1\text{H}$  NMR spectrum of compound **5**.

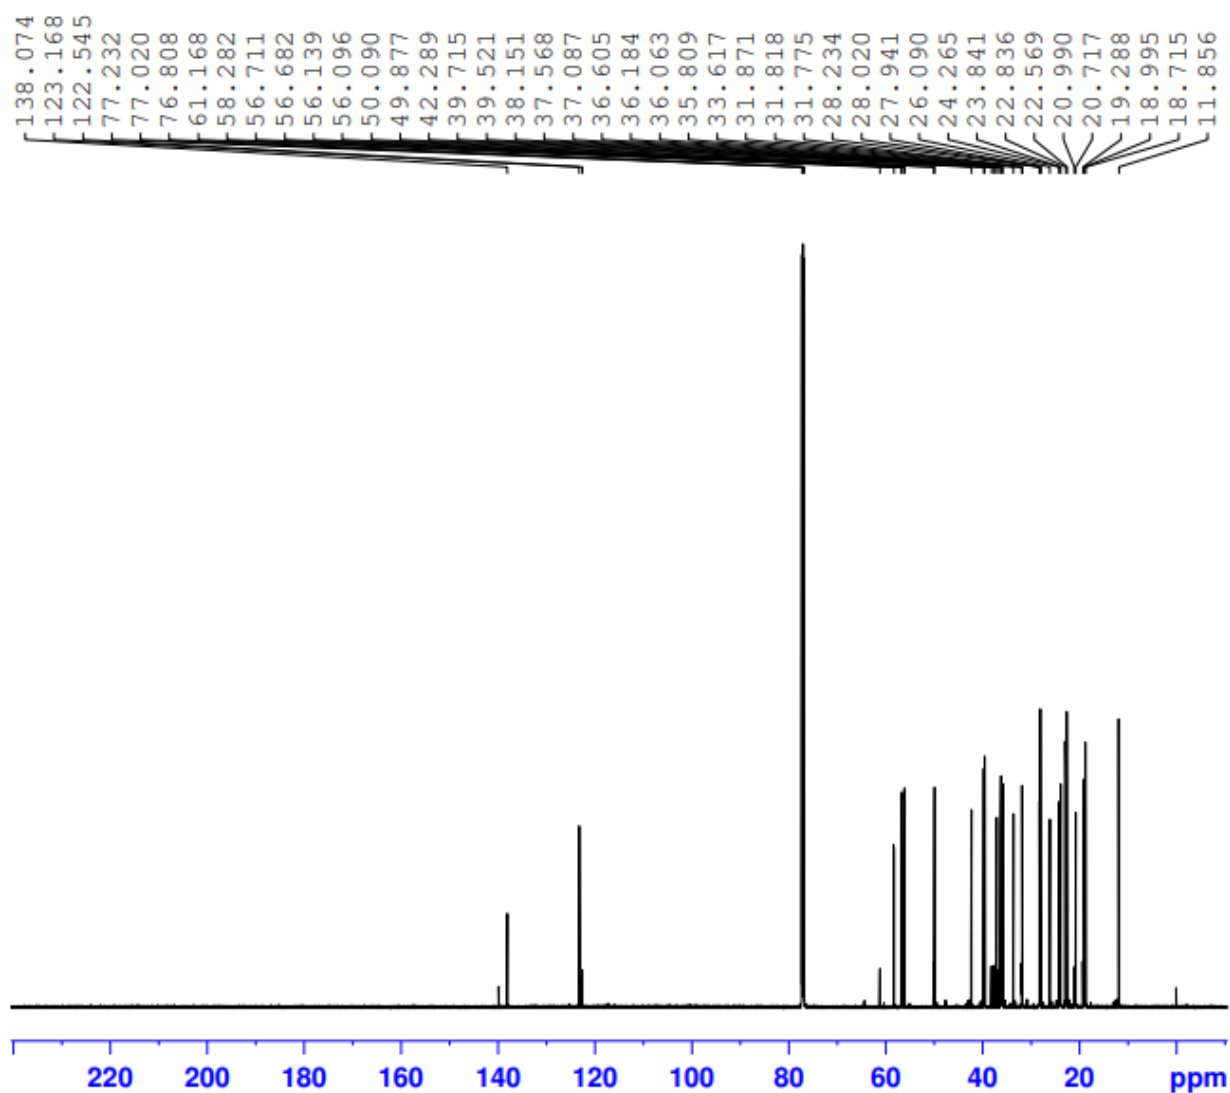

**Fig. S29.**  $^{13}\text{C}$   $\{^1\text{H}\}$  NMR spectrum (150 MHz,  $\text{CDCl}_3$ ) of compound **5**. This spectrum was slightly adapted from [9] (“Synthesis, antimicrobial and cytotoxicity evaluation of new cholesterol congeners”, © 2015 M. R. E. S. Aly et al., published by the Beilstein-Institut, distributed under the terms of the Creative Commons Attribution 2.0 Generic License, <https://creativecommons.org/licenses/by/2.0>). This spectrum was incorrectly assigned to  $3\beta$ -azidocholest-5-ene in [9].



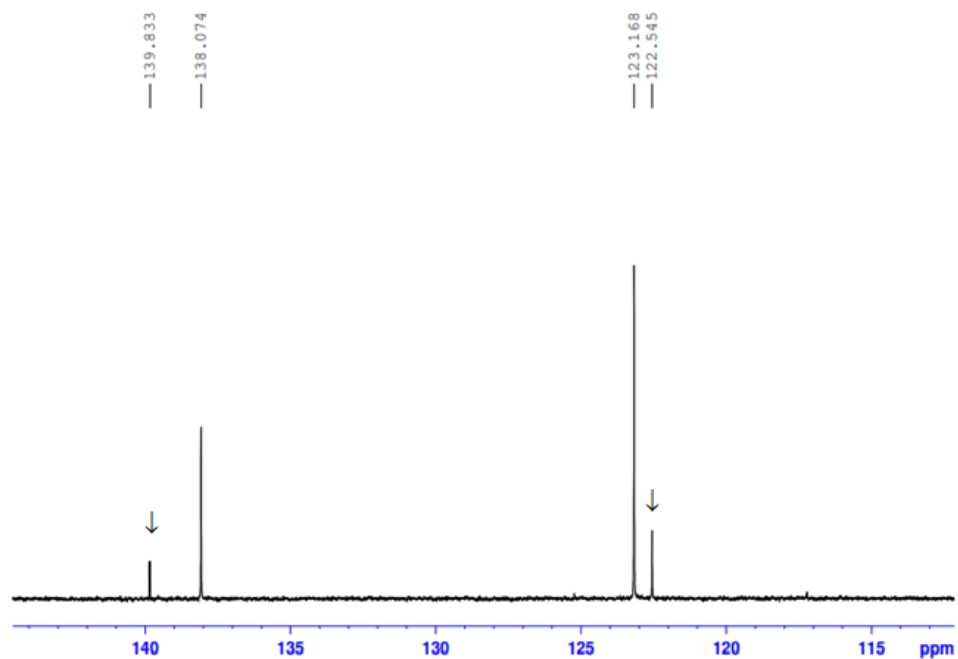

**Fig. S30.** Cross-section in the  $^{13}\text{C}$   $\{^1\text{H}\}$  NMR spectrum (150 MHz,  $\text{CDCl}_3$ ) of compound **5**. The arrows here and in the next cross-sections denote to the signals arising from the presence of trace of  $3\beta$ -azidocholest-5-ene [10].

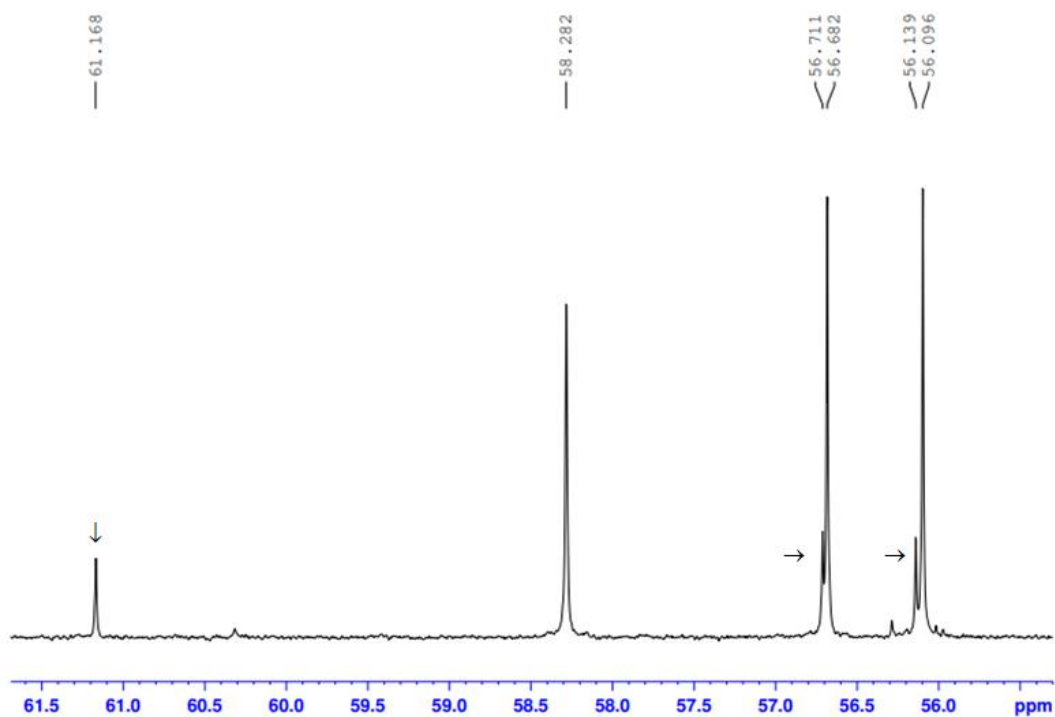

**Fig. S31.** Cross-section in the  $^{13}\text{C}$   $\{^1\text{H}\}$  NMR spectrum (150 MHz,  $\text{CDCl}_3$ ) of compound **5**.

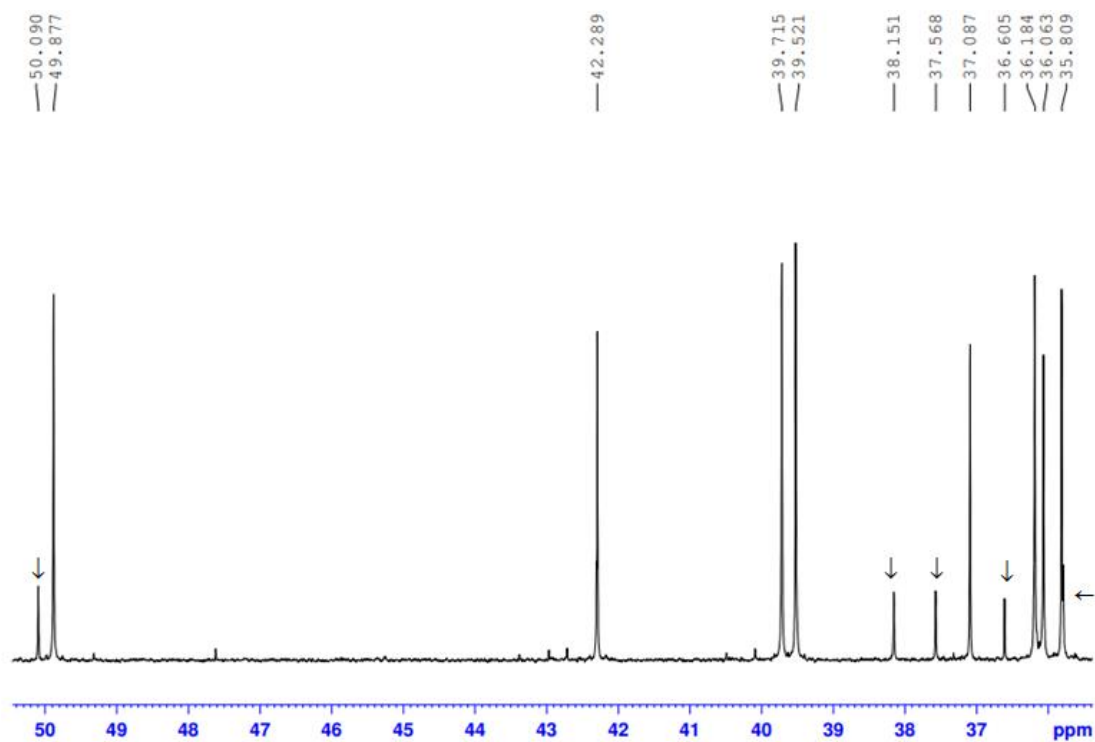

**Fig. S32.** Cross-section in the  $^{13}\text{C} \{^1\text{H}\}$  NMR spectrum (150 MHz,  $\text{CDCl}_3$ ) of compound **5**.

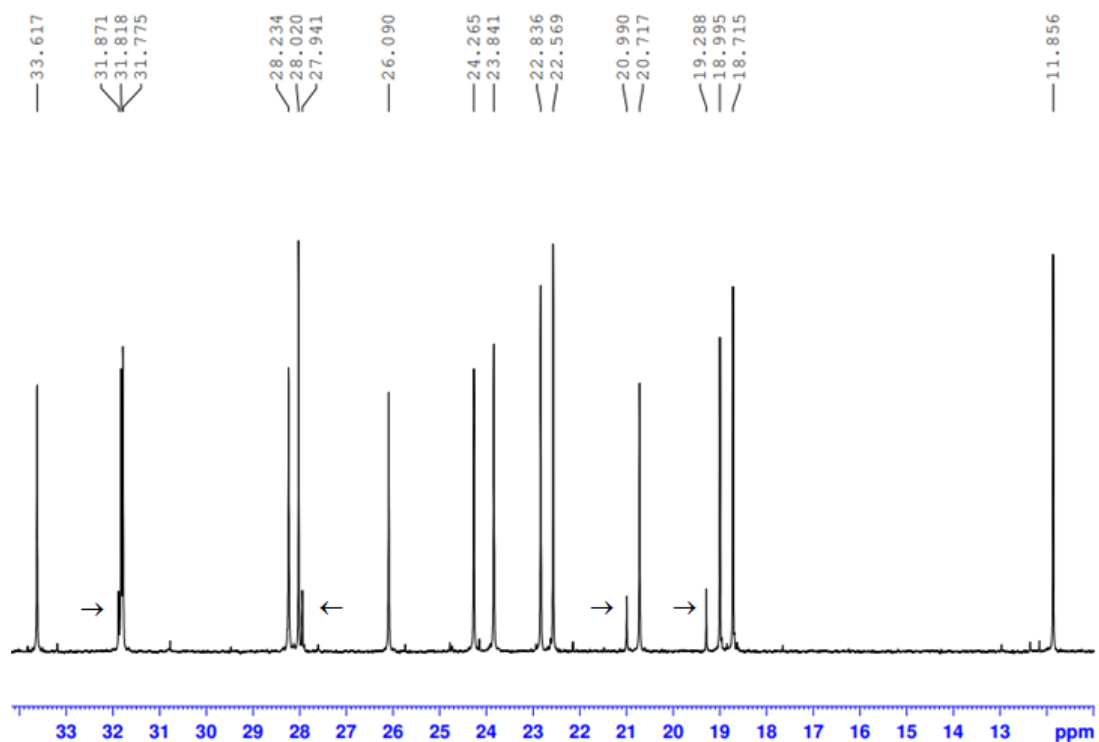

**Fig. S33.** Cross-section in the  $^{13}\text{C} \{^1\text{H}\}$  NMR spectrum (150 MHz,  $\text{CDCl}_3$ ) of compound **5**.

### III. References

1. Hooft, R.W.W. *COLLECT* **1998**, Nonius BV, Delft, The Netherlands.
2. Otwinowski, Z.; Minor, W. *Methods in Enzymology, Macromolecular Crystallography, Part A* **1997**, 276, 307–326. Edited by Carter Jr C. W.; Sweet, R. M. New York: Academic Press.
3. Sheldrick, G. M. *SADABS* Version 2008/2 **1996**, University of Göttingen, Germany.
4. Rigaku Oxford Diffraction, **2018**, *CrysAlisPro* Software system, Rigaku Corporation, Oxford, UK.
5. Sheldrick, G. M. *Acta Crystallogr. Sect. A* **2015**, 71, 3–8.
6. Dolomanov, O. V; Bourhis, L. J.; Gildea, R. J.; Howard, J. A. K.; Puschmann, H. *J. Appl. Crystallogr.* **2009**, 42, 339–341.
7. Sheldrick, G. M. *Acta Crystallogr. Sect. C* **2015**, 71, 3–8.
8. Houston, T. A.; Quader, S.; Boyd, S. E.; Jenkins, I. D.; Healy, P. C. *Acta Cryst.* **2008**, E64, o1738.
9. Aly, M. R. E.; Saad, H. A.; Abdel Hafez, S. H. *Beilstein J. Org. Chem.* **2015**, 11, 1922–1932. doi.org/10.3762/bjoc.11.208
10. Sun, Q.; Cai, S.; Peterson, B. R. *Org. Lett.* **2009**, 11, 567–570. doi.org/10.1021/ol802343z
